# Supplementary material for: Sustainable carbonaceous nanomaterial supported palladium as an efficient ligand-free heterogeneouscatalyst for Suzuki–Miyaura coupling
Source: Royal Society of Chemistry journal article supplement (doi:10.1039/d4na00116h), 2024-01-01

## Supporting Information

### Sustainable Carbonaceous Nanomaterial Supported Palladium as an Efficient Ligand-Free Heterogeneous Catalyst for Suzuki-Miyaura Coupling

Apoorva Shetty et al

#### The analytical data of biphenyl derivatives

1. [1,1'-biphenyl]-4-ol (**1f**):  $^1\text{H}$  NMR (400 MHz, DMSO)  $\delta$  9.55 (s, 1H), 7.60 – 7.53 (m, 2H), 7.48 (d,  $J = 8.5$  Hz, 2H), 7.40 (t,  $J = 7.6$  Hz, 2H), 7.27 (t,  $J = 7.4$  Hz, 1H), 6.84 (d,  $J = 8.5$  Hz, 2H); MS,  $m/z$  (%): 170 [ $\text{M}^+$ ].

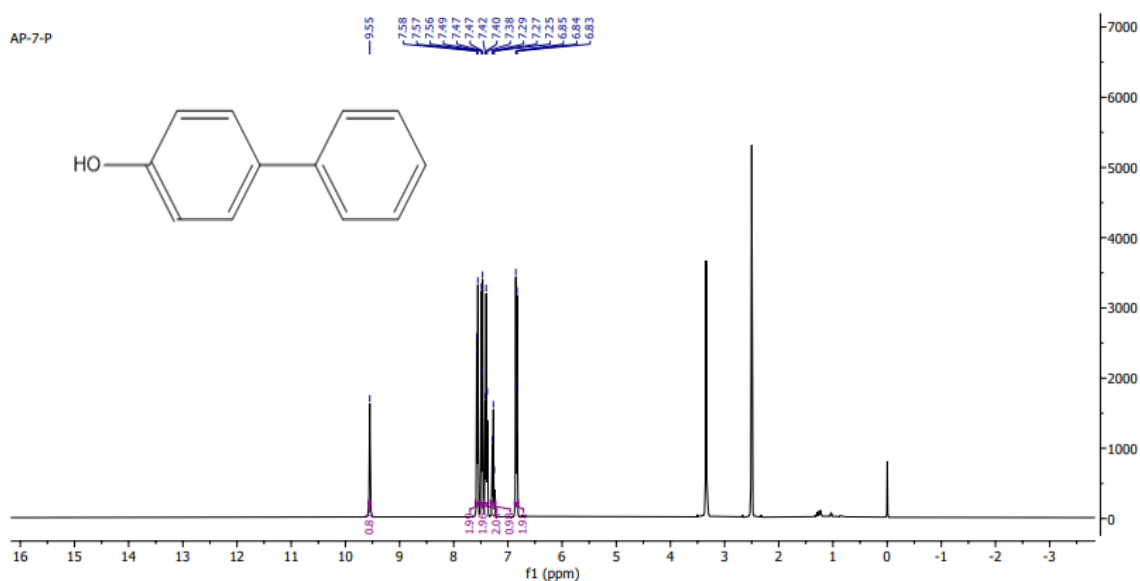

Figure 1A:  $^1\text{H}$  NMR (400 MHz, DMSO) of [1,1'-biphenyl]-4-ol (**1f**)

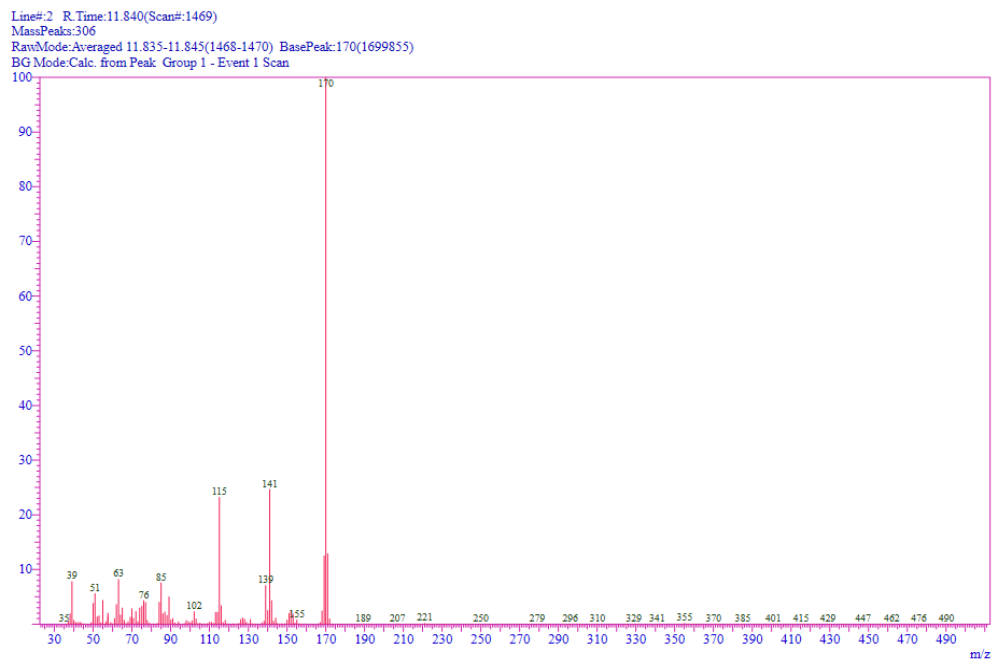

**Figure 1B:** GC-MS spectrum of [1,1'-biphenyl]-4-ol (1f)

**2. 4-(naphthalen-1-yl)phenol (2f): MS,  $m/z$  (%): 220 [ $M^+$ ].**

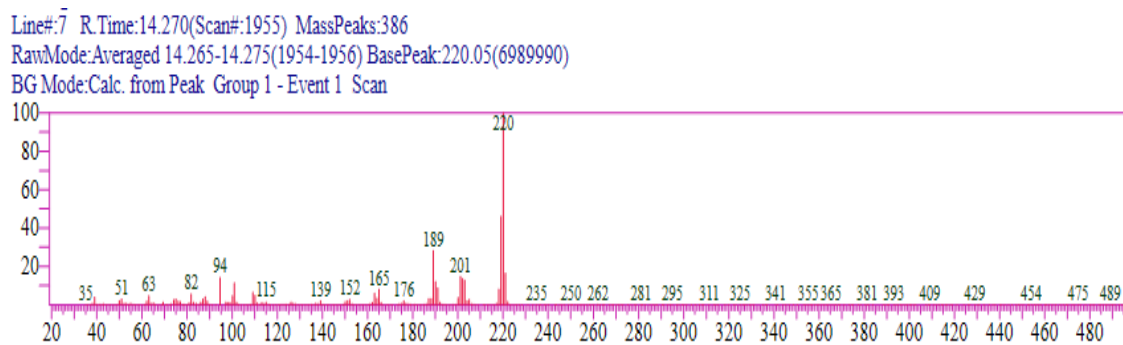

**Figure 2A:** GC-MS spectrum of 4-(naphthalen-1-yl)phenol (2f)

3. 4'-methoxy-[1,1'-biphenyl]-4-ol (3f):  $^1\text{H}$  NMR (400 MHz, DMSO)  $\delta$  9.45 (s, 1H), 7.49 (dd,  $J$  = 8.5, 1.5 Hz, 2H), 7.41 (dd,  $J$  = 8.4, 1.5 Hz, 2H), 6.97 (dd,  $J$  = 8.5, 1.5 Hz, 2H), 6.81 (dd,  $J$  = 8.5, 1.5 Hz, 2H), 3.77 (s, 3H);  $^{13}\text{C}$  NMR (101 MHz, DMSO)  $\delta$  158.11, 156.51, 132.76, 130.75, 127.24, 127.02, 115.64, 114.23, 55.12; MS,  $m/z$  (%): 200 [ $\text{M}^+$ ].

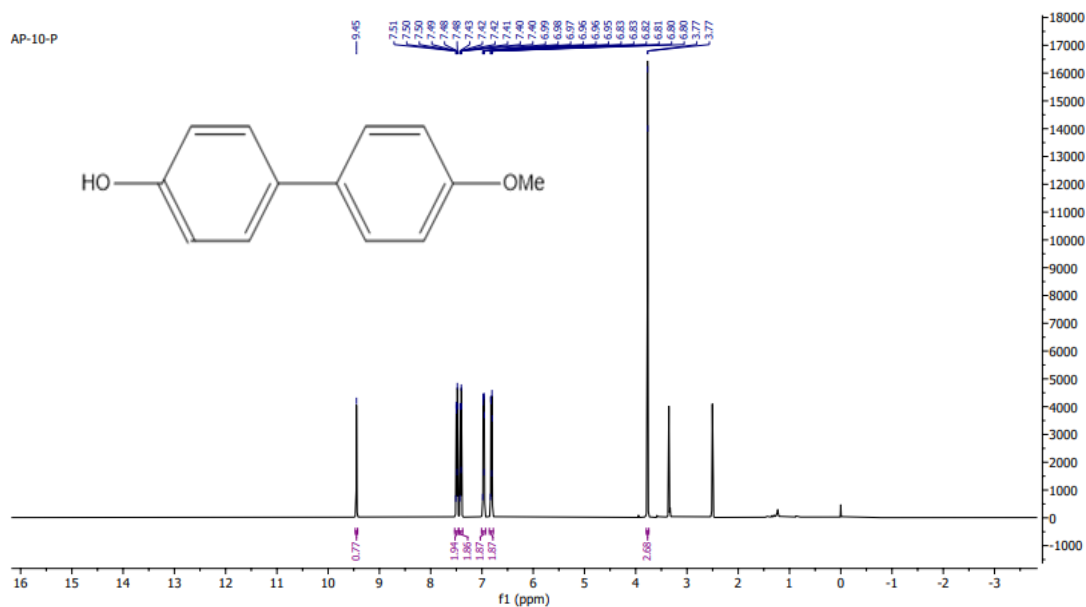

Figure 3A:  $^1\text{H}$  NMR (400 MHz, DMSO) of 4'-methoxy-[1,1'-biphenyl]-4-ol (3f)

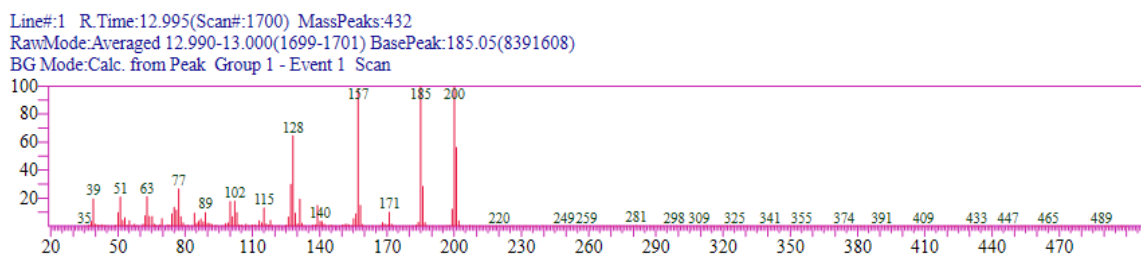

Figure 3B: GC-MS spectrum of 4'-methoxy-[1,1'-biphenyl]-4-ol (3f)

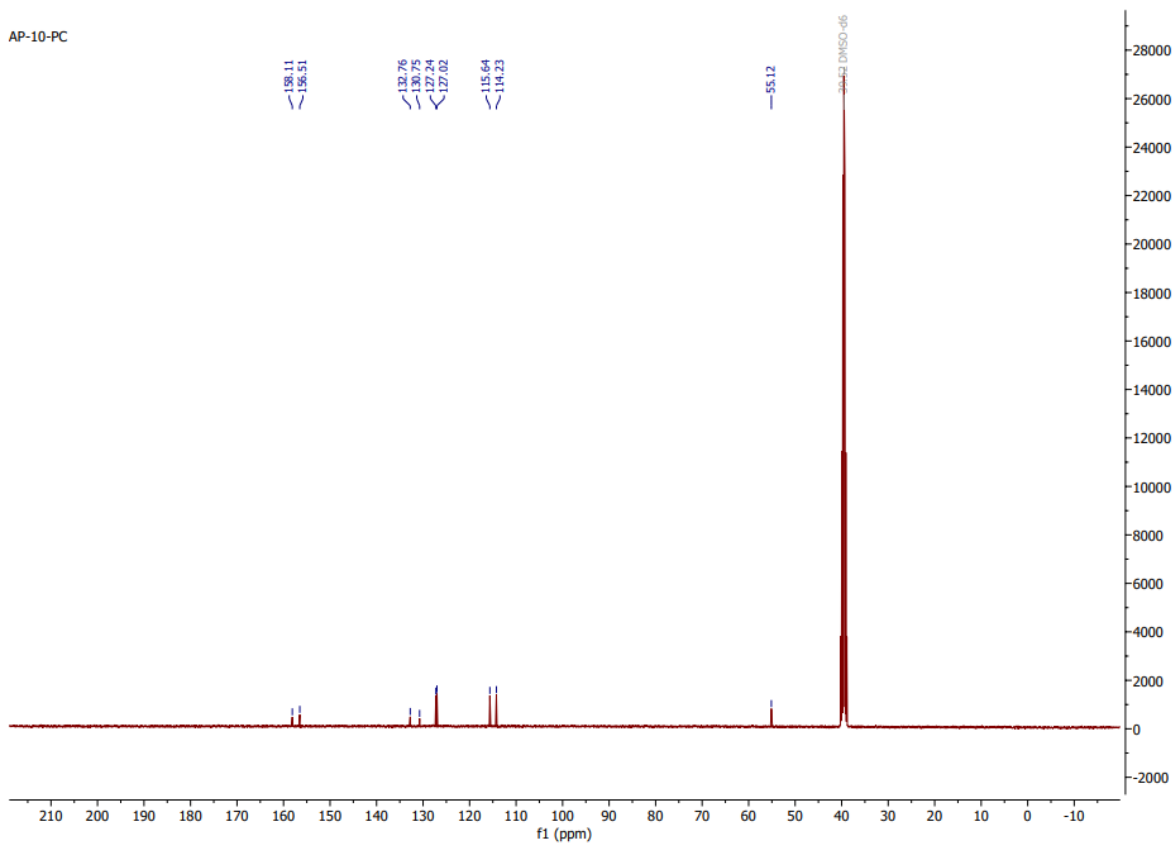

**Figure 3C:**  $^{13}\text{C}$  NMR (101 MHz, DMSO) of 4'-methoxy-[1,1'-biphenyl]-4-ol (3f)

**4. 4-methoxy-1,1'-biphenyl (4f) :**  $^1\text{H}$  NMR (400 MHz, DMSO)  $\delta$  7.61 (dd,  $J = 8.4, 3.1$  Hz, 4H), 7.43 (t,  $J = 7.5$  Hz, 2H), 7.31 (t,  $J = 7.3$  Hz, 1H), 7.03 (d,  $J = 8.3$  Hz, 2H), 3.80 (s, 3H). MS,  $m/z$  (%): 184 [ $\text{M}^+$ ].

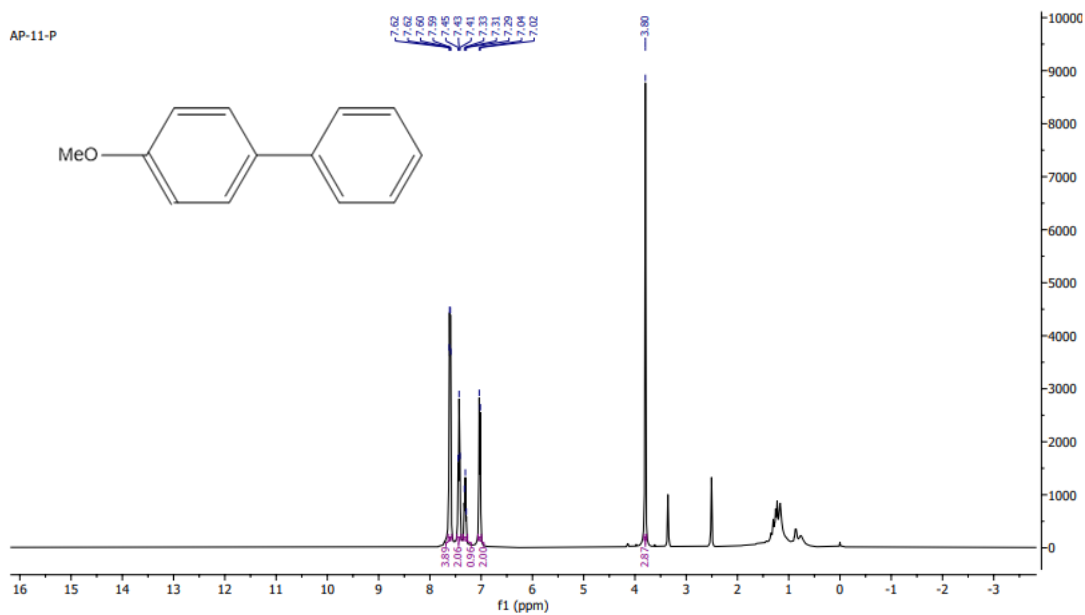

**Figure 4A:**  $^1\text{H}$  NMR (400 MHz, DMSO) of 4-methoxy-1,1'-biphenyl (4f)

Line#:1 R.Time:11.240(Scan#:1349) MassPeaks:171  
RawMode:Averaged 11.240-11.245(1349-1350) BasePeak:184.85(18404)  
BG Mode:Calc. from Peak Group 1 - Event 1 Scan

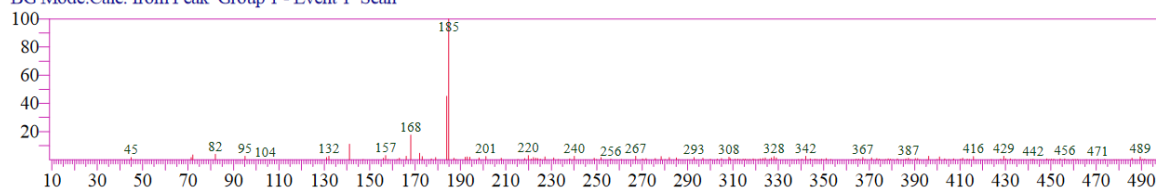

**Figure 4B:** GC-MS spectrum of 4-methoxy-1,1'-biphenyl (4f)

**5. 1-(4-methoxyphenyl)naphthalene (5f):**  $^1\text{H NMR}$  (400 MHz, DMSO)  $\delta$  8.03 – 7.96 (m, 1H), 7.92 (dd,  $J = 8.3, 1.2$  Hz, 1H), 7.83 (dd,  $J = 8.3, 1.4$  Hz, 1H), 7.60 – 7.37 (m, 6H), 7.14 – 7.06 (m, 2H), 3.84 (s, 3H).MS,  $m/z$  (%): 234 [ $\text{M}^+$ ].

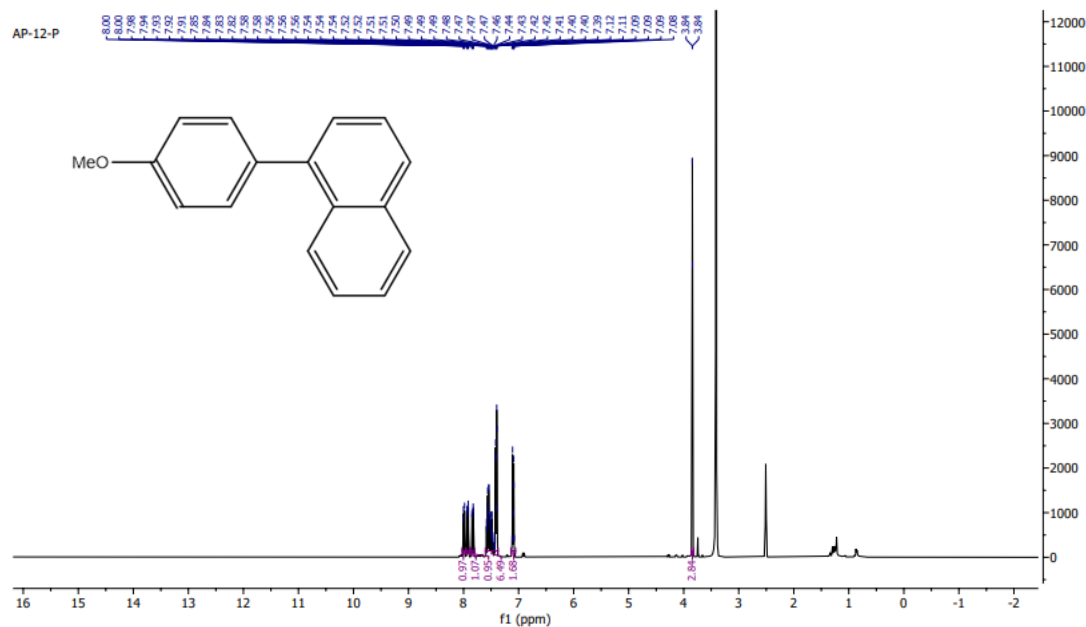

**Figure 5A:**  $^1\text{H NMR}$  (400 MHz, DMSO) of 1-(4-methoxyphenyl)naphthalene (5f)

Line#:3 R.Time:13.550(Scan#:1811) MassPeaks:414  
RawMode:Averaged 13.545-13.555(1810-1812) BasePeak:234.90(8359328)  
BG Mode:Calc. from Peak Group 1 - Event 1 Scan

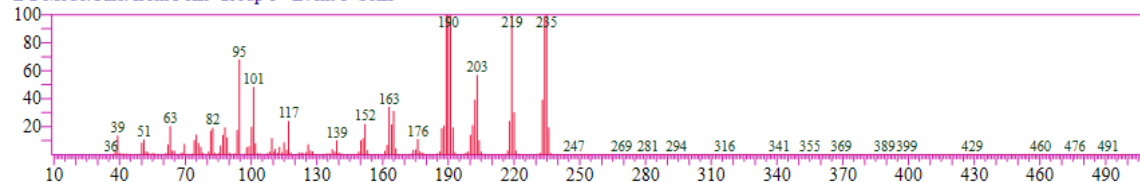

**Figure 5B:** GC-MS spectrum of 1-(4-methoxyphenyl)naphthalene (5f)



7. **1,1'-biphenyl (7f)**:  $^1\text{H NMR}$  (400 MHz, DMSO)  $\delta$  8.06 (d,  $J = 0.9$  Hz, 1H), 7.79 (dt,  $J = 7.8, 1.3$  Hz, 1H), 7.66 (dd,  $J = 8.2, 1.4$  Hz, 2H), 7.47 (dd,  $J = 8.3, 7.1$  Hz, 3H), 7.44 – 7.36 (m, 1H), 7.39 – 7.29 (m, 2H). MS,  $m/z$  (%): 154 [ $\text{M}^+$ ].

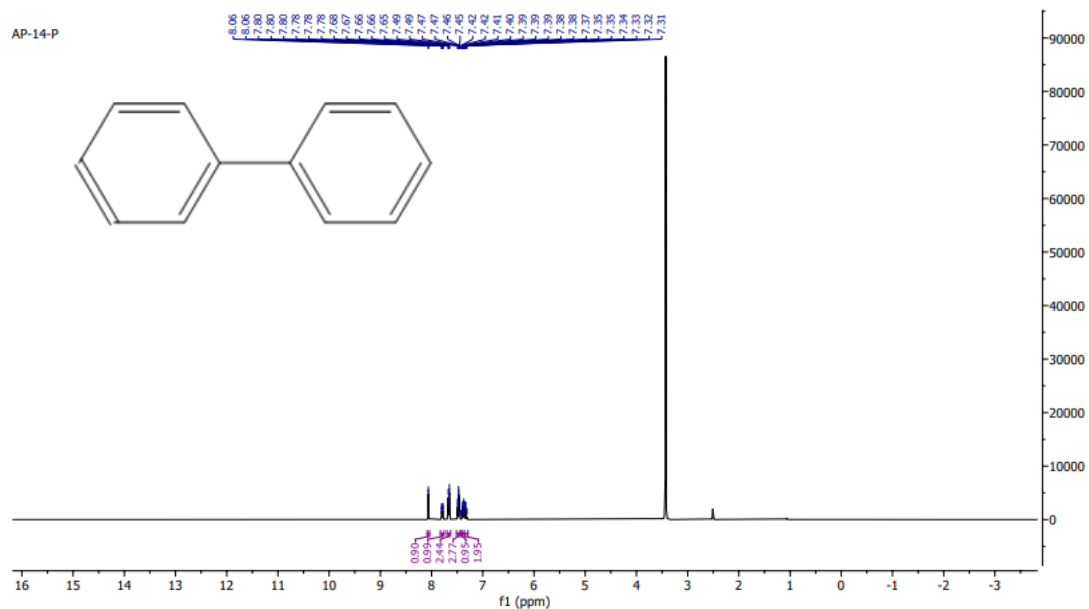

**Figure 7A:**  $^1\text{H NMR}$  (400 MHz, DMSO) of 1,1'-biphenyl (7f)

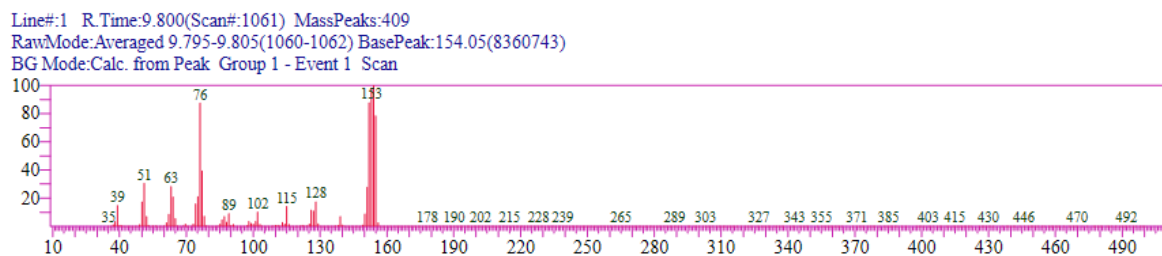

**Figure 7B:** GC-MS spectrum of 1,1'-biphenyl (7f)

**8. 1-phenylnaphthalene (8f):**  $^1\text{H NMR}$  (400 MHz, DMSO)  $\delta$  7.99 (dd,  $J = 18.8, 8.2$  Hz, 2H), 7.80 (d,  $J = 8.4$  Hz, 1H), 7.63 – 7.40 (m, 9H). MS,  $m/z$  (%): 204 [ $\text{M}^+$ ].

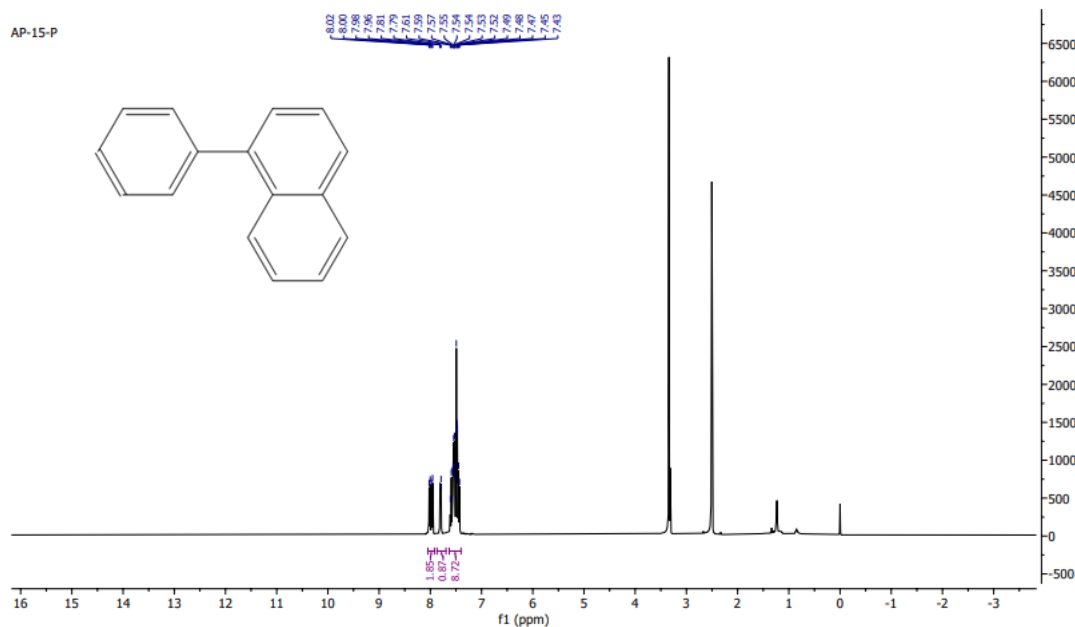

**Figure 8A:**  $^1\text{H NMR}$  (400 MHz, DMSO) of 1-phenylnaphthalene (8f)

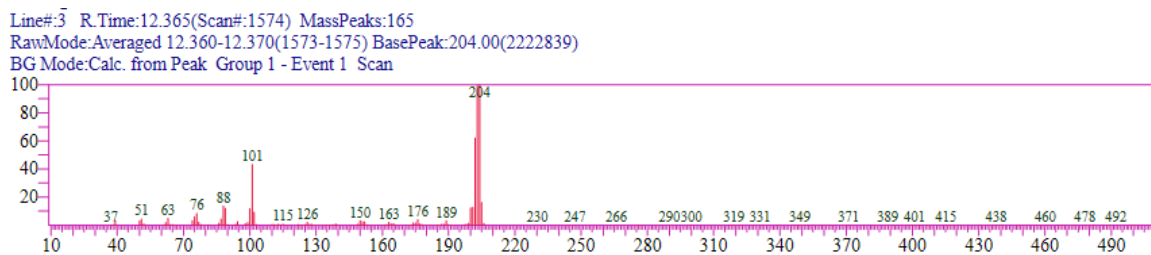

**Figure 8B:** GC-MS spectrum of 1-phenylnaphthalene (8f)

**9. 4-methoxy-1,1'-biphenyl (9f):**  $^1\text{H NMR}$  (400 MHz, DMSO)  $\delta$  7.65 – 7.57 (m, 4H), 7.43 (dd,  $J = 8.3, 7.1$  Hz, 2H), 7.31 (td,  $J = 7.2, 1.3$  Hz, 1H), 7.07 – 7.00 (m, 2H), 3.80 (s, 3H);  $^{13}\text{C NMR}$  (101 MHz, DMSO)  $\delta$  158.89, 139.84, 132.53, 128.86, 127.76, 126.70, 126.18, 114.36, 55.17; MS,  $m/z$  (%): 184 [ $\text{M}^+$ ].



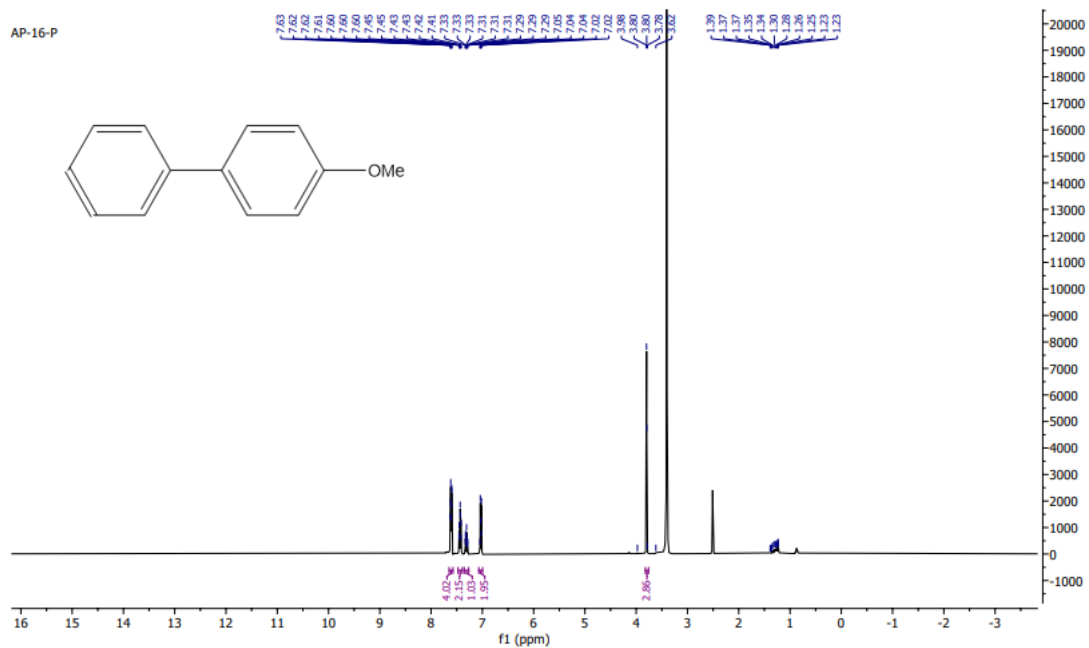

**Figure 9A:**  $^1\text{H}$  NMR (400 MHz, DMSO) of 4-methoxy-1,1'-biphenyl (9f)

Line#:4 R.Time:11.440(Scan#:1389) MassPeaks:154  
 RawMode:Averaged 11.435-11.445(1388-1390) BasePeak:184.00(4450007)  
 BG Mode:Calc. from Peak Group 1 - Event 1 Scan

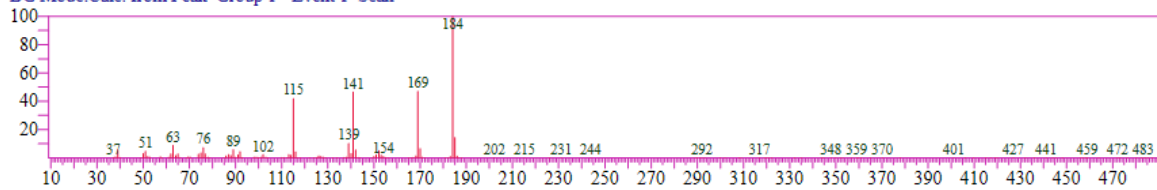

**Figure 9B:** GC-MS spectrum of 4-methoxy-1,1'-biphenyl (9f)

AP-16-P

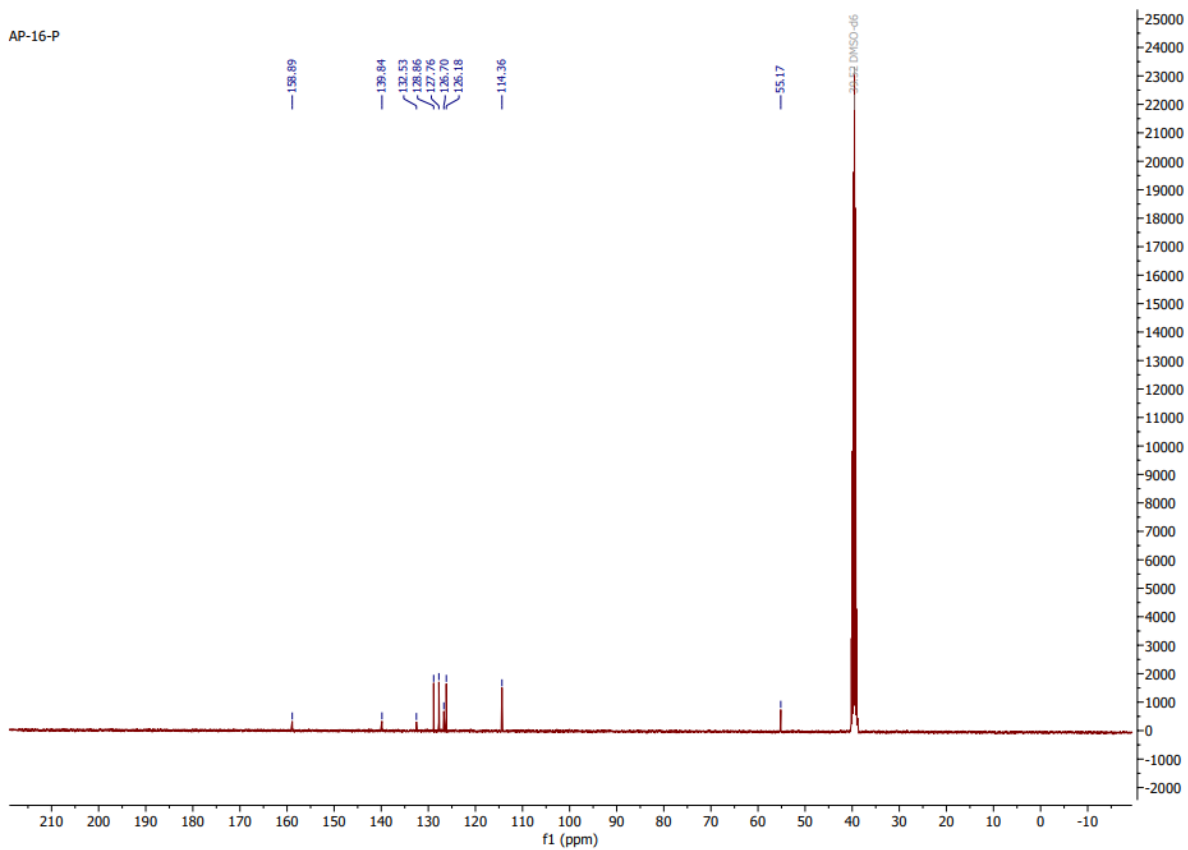

**Figure 9C:** <sup>13</sup>C NMR (101 MHz, DMSO) of 4-methoxy-1,1'-biphenyl (9f)



AP-23-P

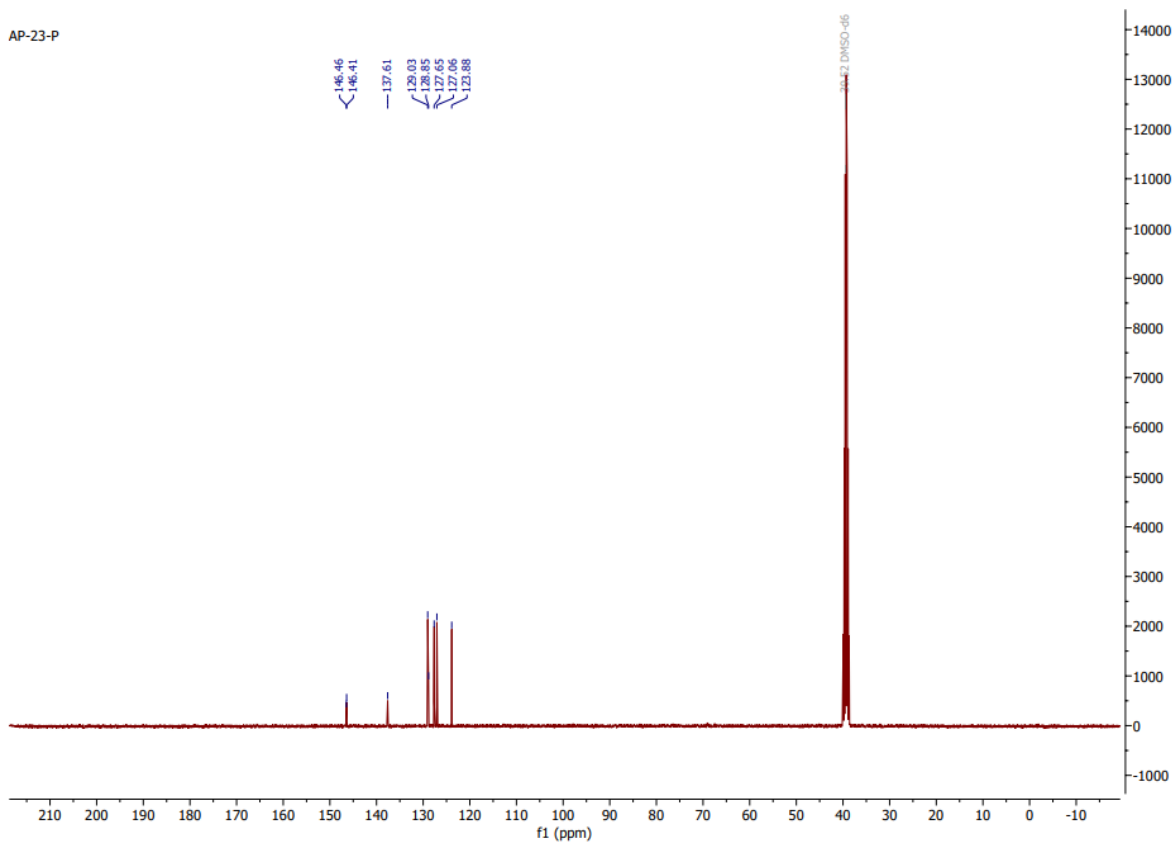

**Figure 10C:**  $^{13}\text{C}$  NMR (101 MHz, DMSO) of 4-nitro-1,1'-biphenyl (10f)

**11. 1-(4-nitrophenyl)naphthalene (11f):**  $^1\text{H}$  NMR (400 MHz, DMSO)  $\delta$  8.38 (dt,  $J = 8.4, 1.9$  Hz, 2H), 8.09 – 8.02 (m, 2H), 7.82 – 7.73 (m, 3H), 7.68 – 7.48 (m, 4H). MS,  $m/z$  (%): 249 [ $\text{M}^+$ ].

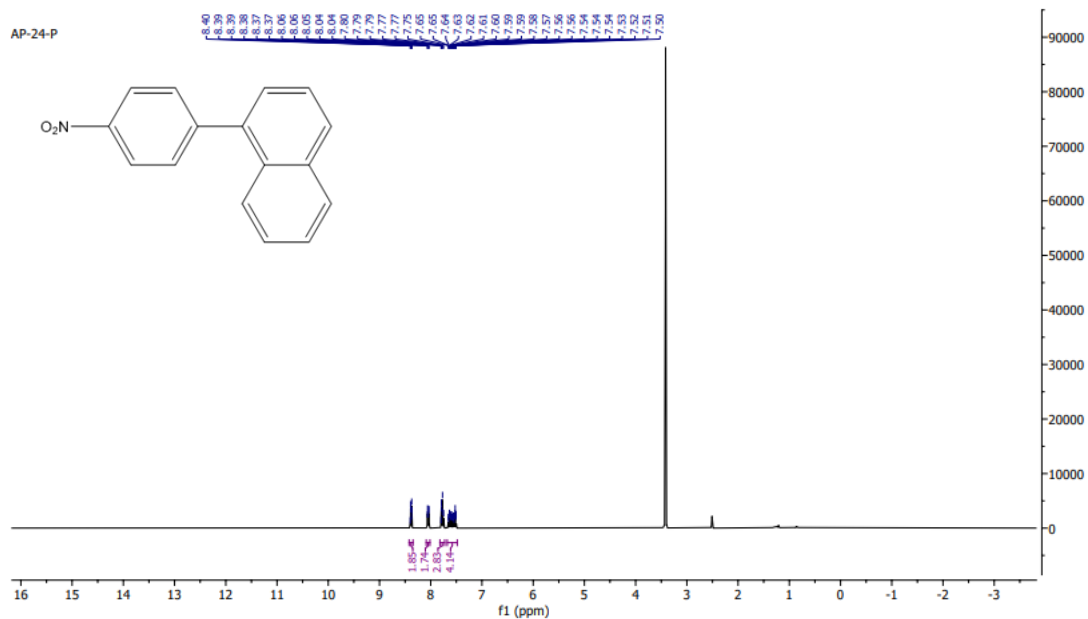

**Figure 11A:**  $^1\text{H}$  NMR (400 MHz, DMSO) of 1-(4-nitrophenyl)naphthalene (11f)

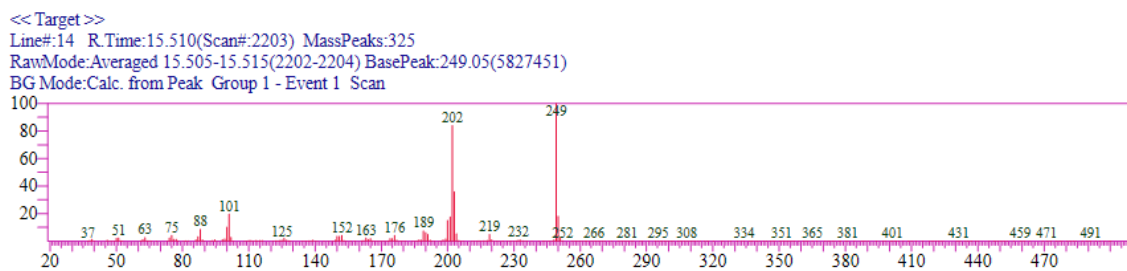

**Figure 11B:** GC-MS spectrum of 1-(4-nitrophenyl)naphthalene (11f)

**12. 4-methoxy-4'-nitro-1,1'-biphenyl (12f):**  $^1\text{H}$  NMR (400 MHz, DMSO)  $\delta$  8.26 (d,  $J = 8.6$  Hz, 2H), 7.91 (d,  $J = 8.5$  Hz, 2H), 7.76 (d,  $J = 8.4$  Hz, 2H), 7.09 (d,  $J = 8.3$  Hz, 2H), 3.82 (s, 3H);  $^{13}\text{C}$  NMR (101 MHz, DMSO)  $\delta$  160.20, 146.30, 146.02, 129.94, 128.60, 127.03, 124.12, 114.71, 55.34; MS,  $m/z$  (%): 229 [ $\text{M}^+$ ].

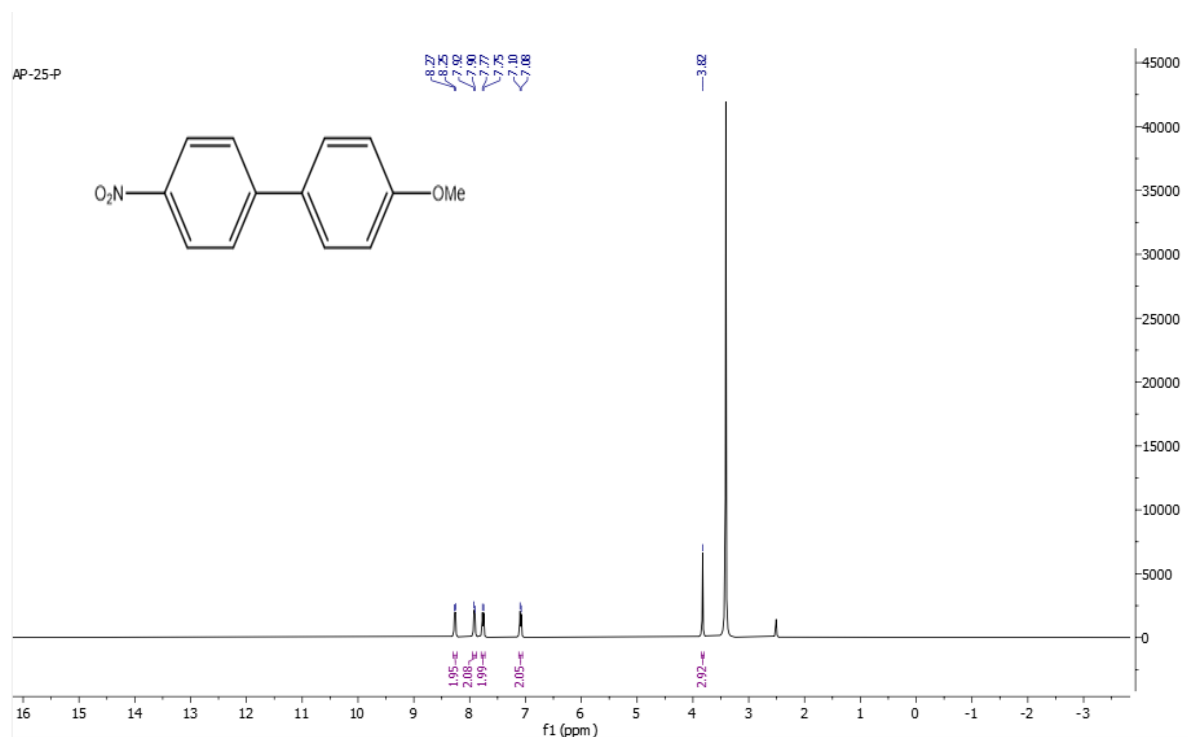

**Figure 12A:**  $^1\text{H}$  NMR (400 MHz, DMSO) of 4-methoxy-4'-nitro-1,1'-biphenyl (12f)

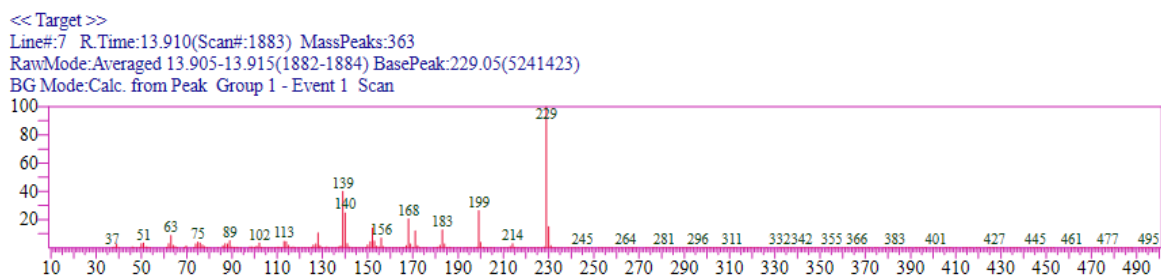

**Figure 12B:** GC-MS spectrum of 4-methoxy-4'-nitro-1,1'-biphenyl (12f)

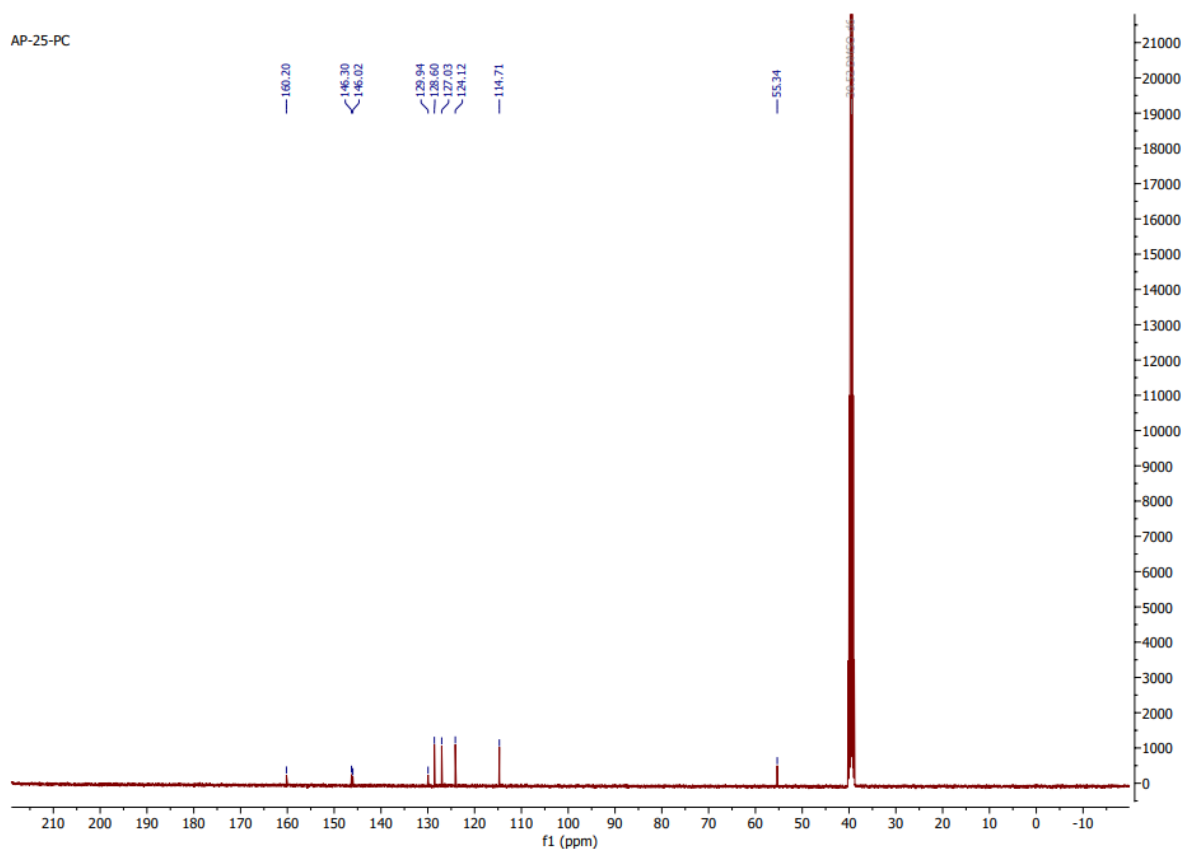

**Figure 12C:**  $^{13}\text{C}$  NMR (101 MHz, DMSO) of 4-methoxy-4'-nitro-1,1'-biphenyl (12f)

13. [1,1'-biphenyl]-4-carbonitrile (13f):  $^1\text{H}$  NMR (400 MHz, DMSO)  $\delta$  7.96 – 7.84 (m, 4H), 7.78 – 7.71 (m, 2H), 7.56 – 7.49 (m, 2H), 7.49 – 7.41 (m, 1H).

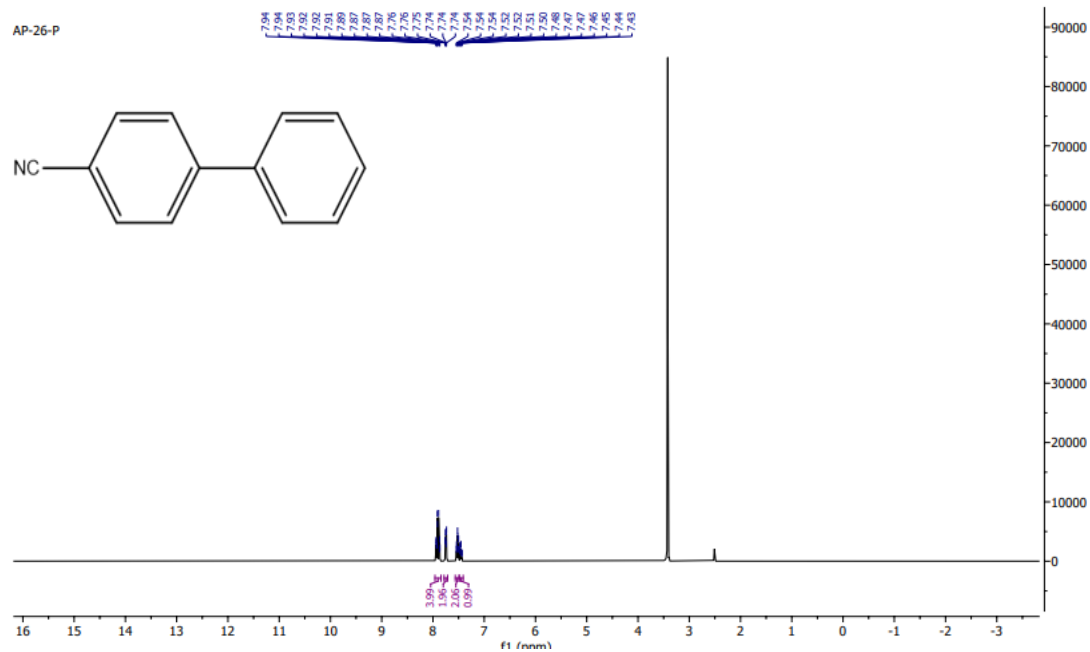

Figure 13A:  $^1\text{H}$  NMR (400 MHz, DMSO) of [1,1'-biphenyl]-4-carbonitrile (13f)

**14. 4-(naphthalen-1-yl)benzotrile (14f):**  $^1\text{H NMR}$  (400 MHz, DMSO)  $\delta$  8.06 – 7.95 (m, 4H), 7.76 – 7.64 (m, 3H), 7.65 – 7.50 (m, 3H), 7.47 (dd,  $J = 7.1, 1.3$  Hz, 1H). MS,  $m/z$  (%): 229 [ $\text{M}^+$ ].

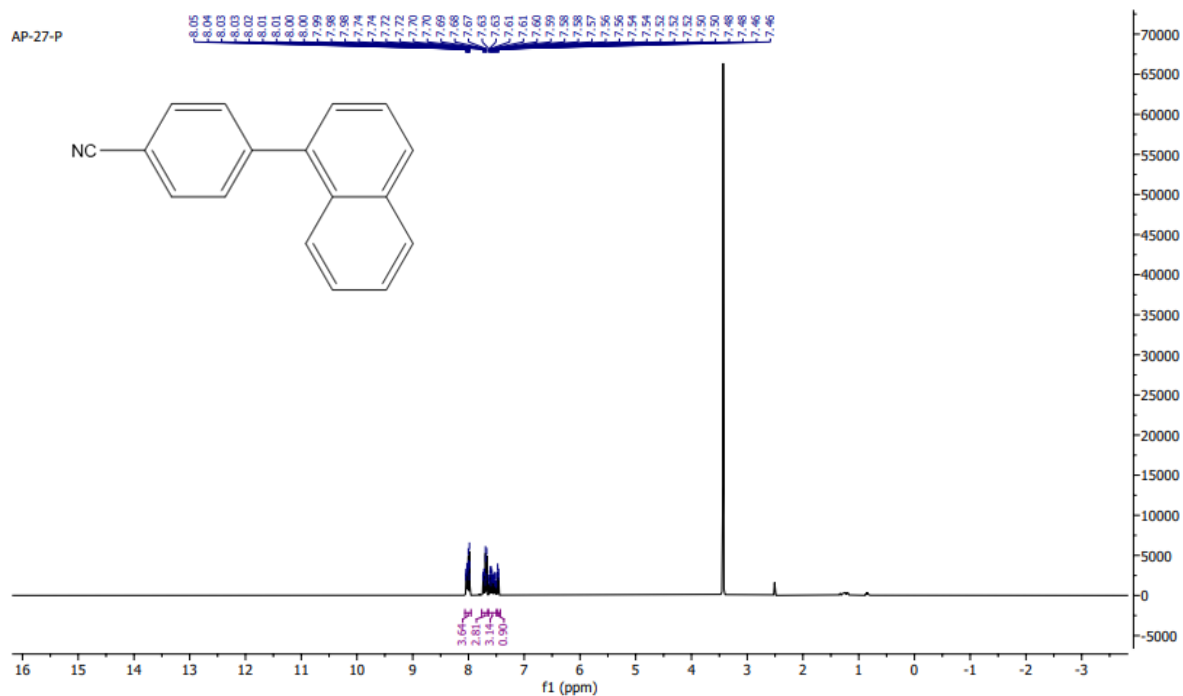

**Figure 14A:**  $^1\text{H NMR}$  (400 MHz, DMSO) of 4-(naphthalen-1-yl)benzotrile (14f)

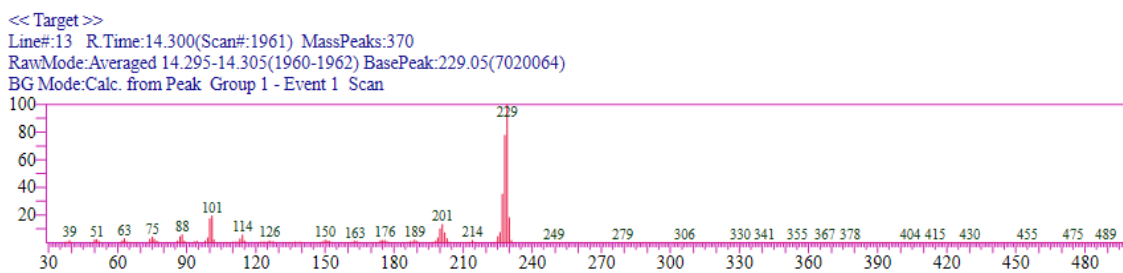

**Figure 14B:** GC-MS spectrum of 4-(naphthalen-1-yl)benzotrile (14f)



- 15. 4'-methoxy-[1,1'-biphenyl]-4-carbonitrile (15f):**  $^1\text{H NMR}$  (400 MHz, DMSO)  $\delta$  7.91 – 7.80 (m, 4H), 7.76 – 7.67 (m, 2H), 7.07 (dd,  $J = 8.7, 1.3$  Hz, 2H), 3.81 (d,  $J = 1.1$  Hz, 3H). MS,  $m/z$  (%): 209 [ $\text{M}^+$ ].

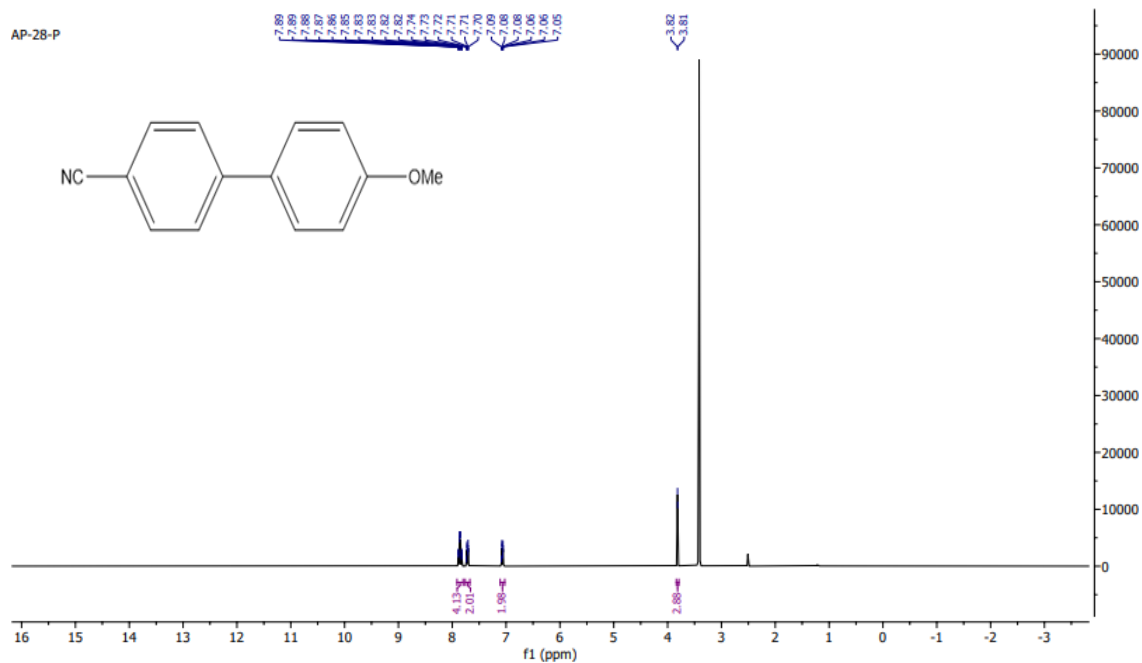

**Figure 15A:**  $^1\text{H NMR}$  (400 MHz, DMSO) of 4'-methoxy-[1,1'-biphenyl]-4-carbonitrile (15f)

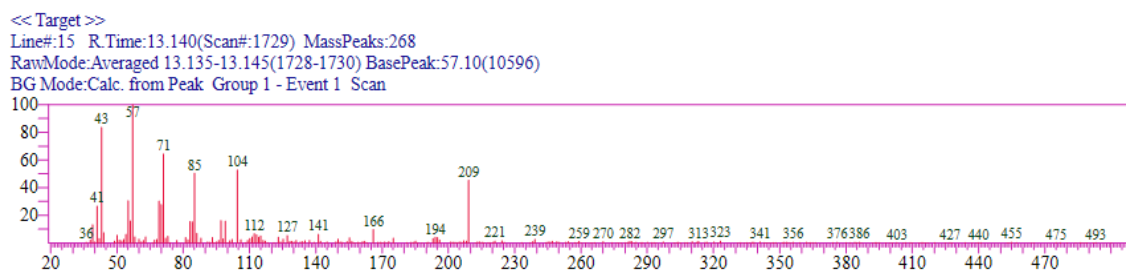

**Figure 15B:** GC-MS spectrum of 4'-methoxy-[1,1'-biphenyl]-4-carbonitrile (15f)

- 16. 4-methyl-1,1'-biphenyl (16f):**  $^1\text{H NMR}$  (400 MHz, DMSO)  $\delta$  8.07 (s, 1H), 7.84 – 7.78 (m, 1H), 7.62 (s, 1H), 7.54 (s, 1H), 7.48 – 7.37 (m, 2H), 7.36 – 7.29 (m, 2H), 7.28 (s, 1H), 2.34 (s, 3H). MS,  $m/z$  (%): 168 [ $\text{M}^+$ ].

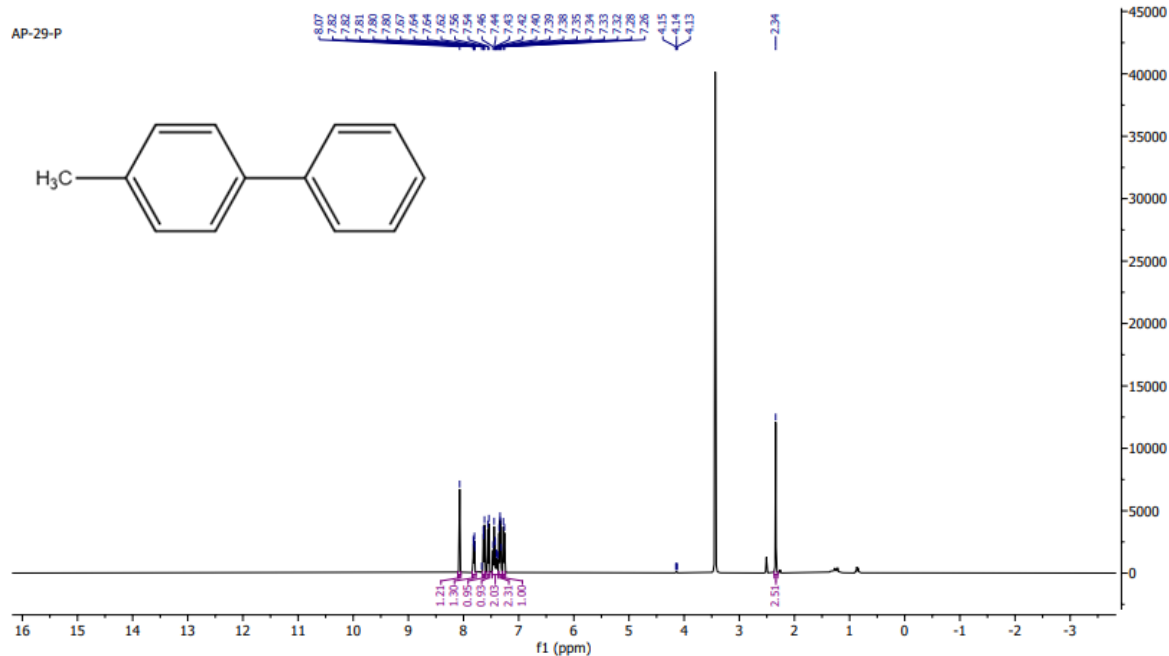

**Figure 16A:**  $^1\text{H}$  NMR (400 MHz, DMSO) of 4-methyl-1,1'-biphenyl (16f)

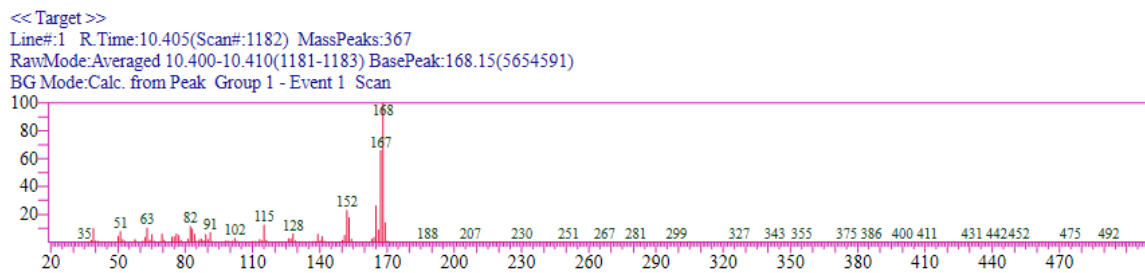

**Figure 16B:** GC-MS spectrum of 4-methyl-1,1'-biphenyl (16f)

17. **1-(p-tolyl)naphthalene (17f):**  $^1\text{H NMR}$  (400 MHz, DMSO)  $\delta$  8.10 – 7.97 (m, 1H), 7.94 (d,  $J = 8.3$  Hz, 1H), 7.82 (d,  $J = 8.3$  Hz, 1H), 7.62 – 7.45 (m, 3H), 7.44 – 7.31 (m, 5H), 2.41 (s, 3H). MS,  $m/z$  (%): 218 [ $\text{M}^+$ ].

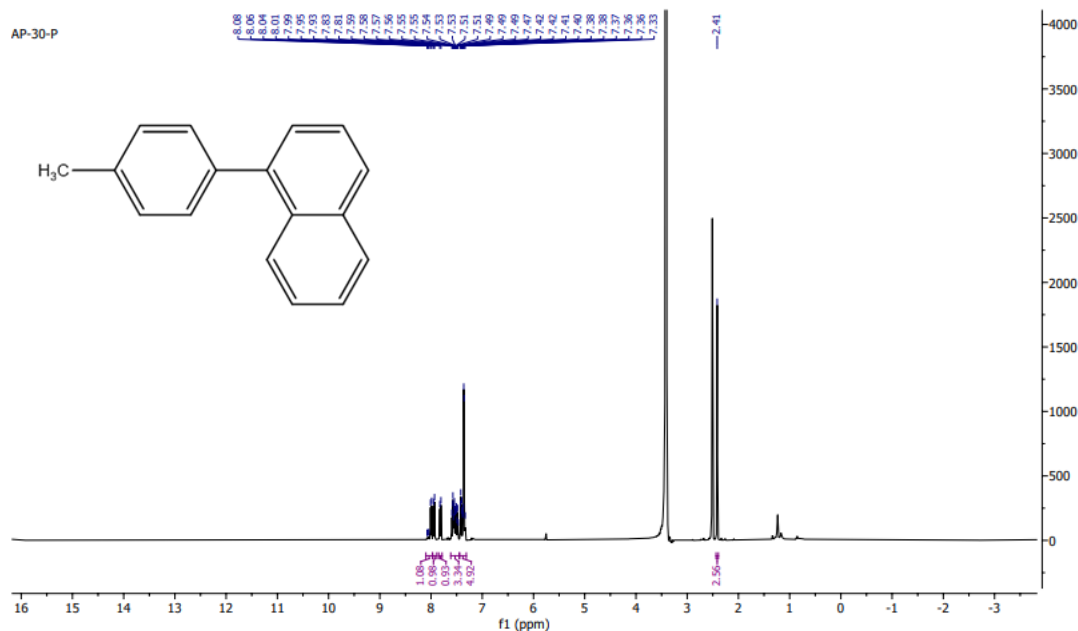

**Figure 17A:**  $^1\text{H NMR}$  (400 MHz, DMSO) of 1-(p-tolyl)naphthalene (17f)

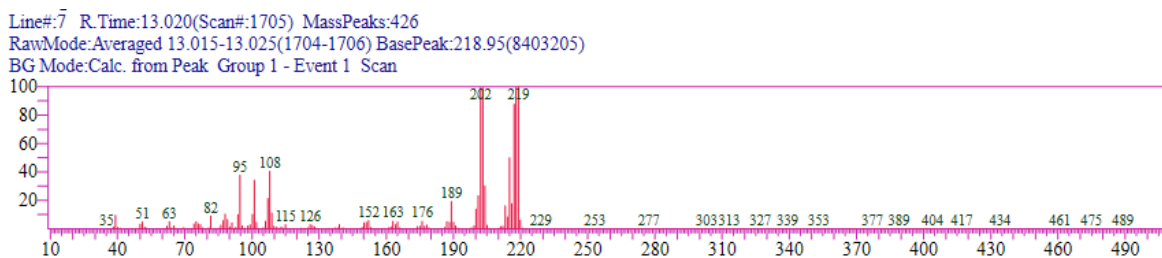

**Figure 17B:** GC-MS spectrum of 1-(p-tolyl)naphthalene (17f)

18. **4-methoxy-4'-methyl-1,1'-biphenyl (18f):**  $^1\text{H NMR}$  (400 MHz, DMSO)  $\delta$  7.61 – 7.54 (m, 2H), 7.50 (d,  $J = 7.9$  Hz, 2H), 7.23 (d,  $J = 7.9$  Hz, 2H), 7.05 – 6.97 (m, 2H), 3.79 (s, 3H), 2.32 (s, 3H);  $^{13}\text{C NMR}$  (101 MHz, DMSO)  $\delta$  159.08, 137.39, 136.29, 132.90, 129.87, 127.89, 126.42, 114.73, 55.57, 21.04; MS,  $m/z$  (%): 183 [ $\text{M}^+$ ].

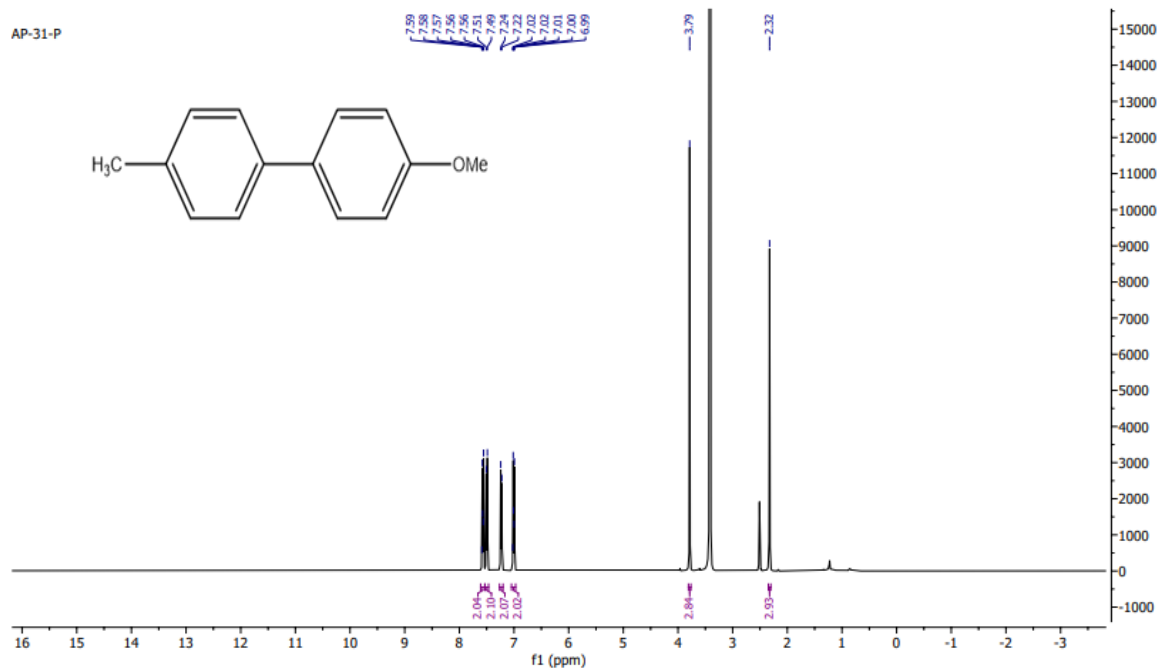

**Figure 18A:**  $^1\text{H}$  NMR (400 MHz, DMSO) of 4-methoxy-4'-methyl-1,1'-biphenyl (18f)

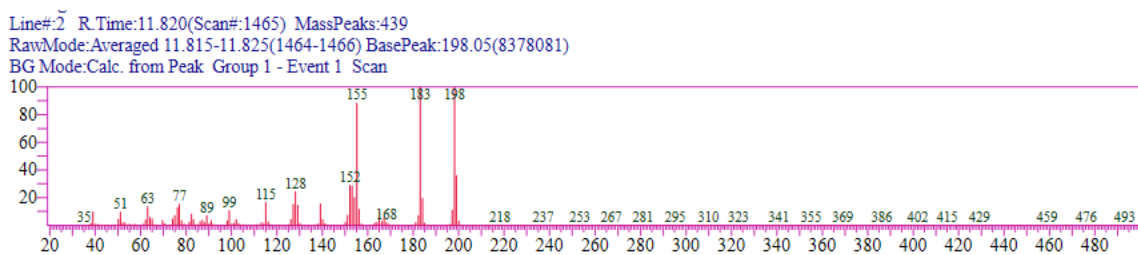

**Figure 18B:** GC-MS spectrum of 4-methoxy-4'-methyl-1,1'-biphenyl (18f)

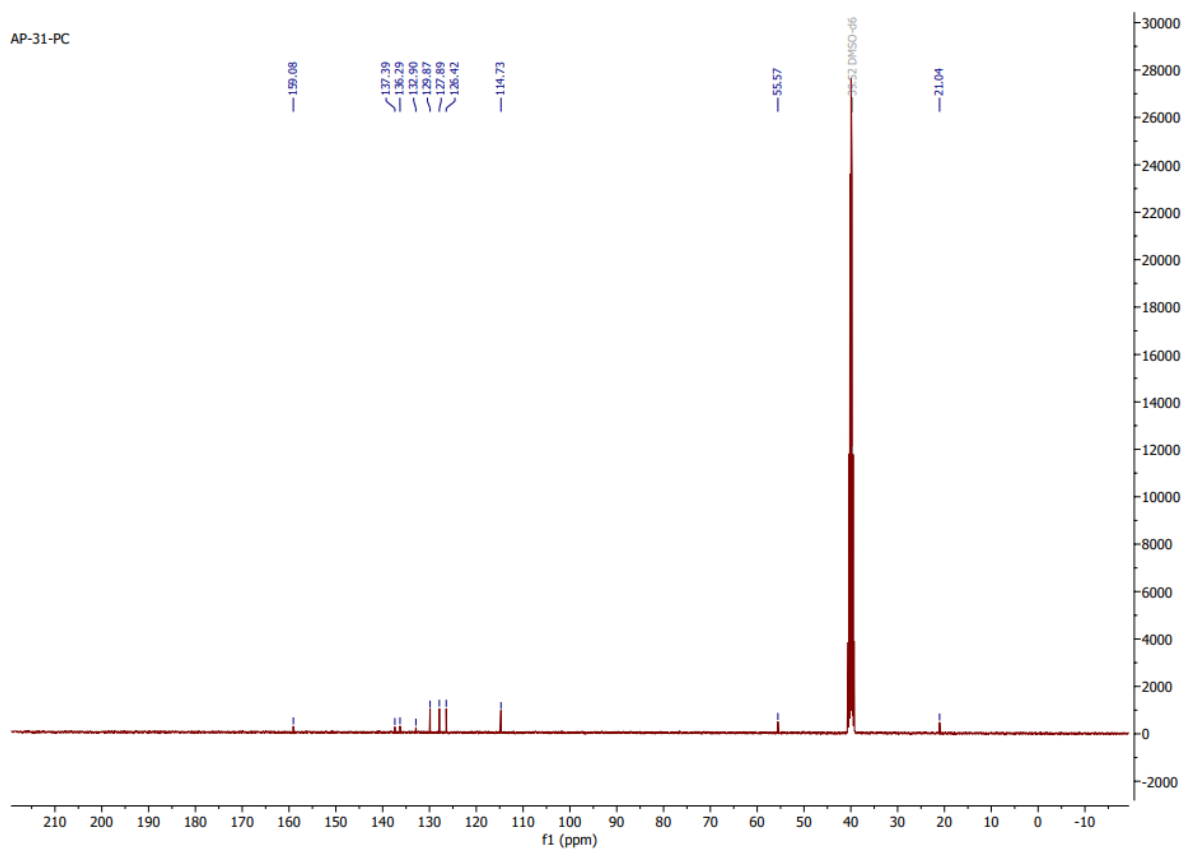

**Figure 18C:**  $^{13}\text{C}$  NMR (101 MHz, DMSO) of 4-methoxy-4'-methyl-1,1'-biphenyl (18f)

19. [1,1'-biphenyl]-4-carbaldehyde (**19f**):  $^1\text{H}$  NMR (400 MHz, DMSO)  $\delta$  10.06 (s, 1H), 8.04 – 7.97 (m, 2H), 7.95 – 7.88 (m, 2H), 7.81 – 7.69 (m, 2H), 7.52 (dd,  $J = 8.3, 6.7$  Hz, 2H), 7.49 – 7.41 (m, 1H).

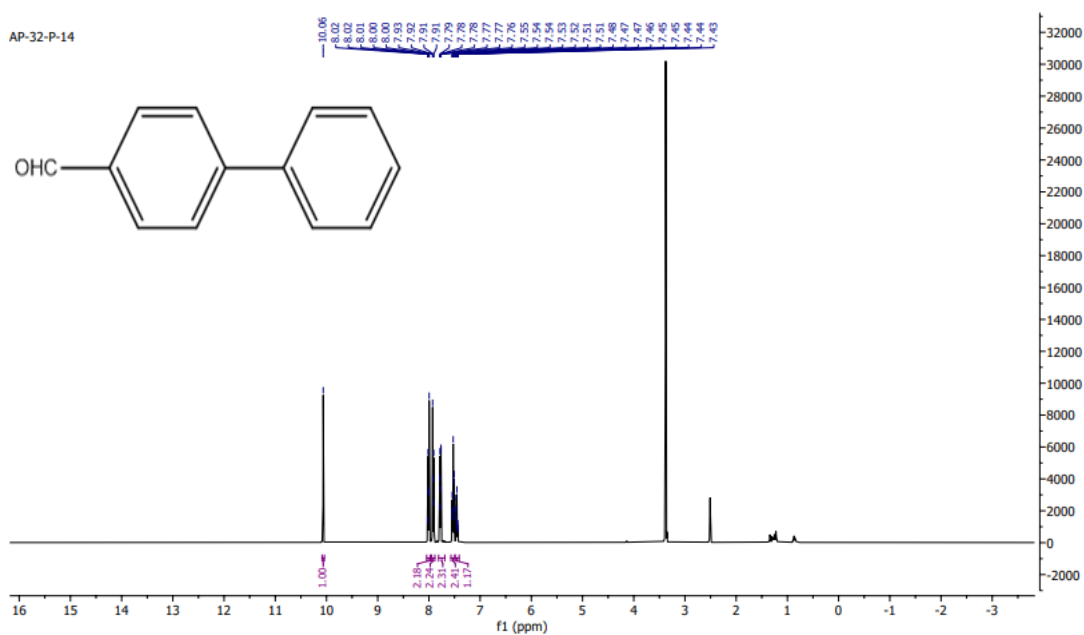

**Figure 19A:**  $^1\text{H}$  NMR (400 MHz, DMSO) of [1,1'-biphenyl]-4-carbaldehyde (19f)

- 20. 4-(naphthalen-1-yl)benzaldehyde (20f):**  $^1\text{H}$  NMR (400 MHz, DMSO)  $\delta$  10.13 (s, 1H), 8.11 – 7.99 (m, 4H), 7.78 (dd,  $J = 8.5, 1.2$  Hz, 1H), 7.75 – 7.69 (m, 2H), 7.68 – 7.54 (m, 2H), 7.57 – 7.47 (m, 2H);  $^{13}\text{C}$  NMR (101 MHz, DMSO)  $\delta$  193.09, 146.35, 138.47, 135.41, 133.63, 130.82, 130.60, 129.89, 128.72, 128.67, 127.31, 126.98, 126.38, 125.79, 125.10.

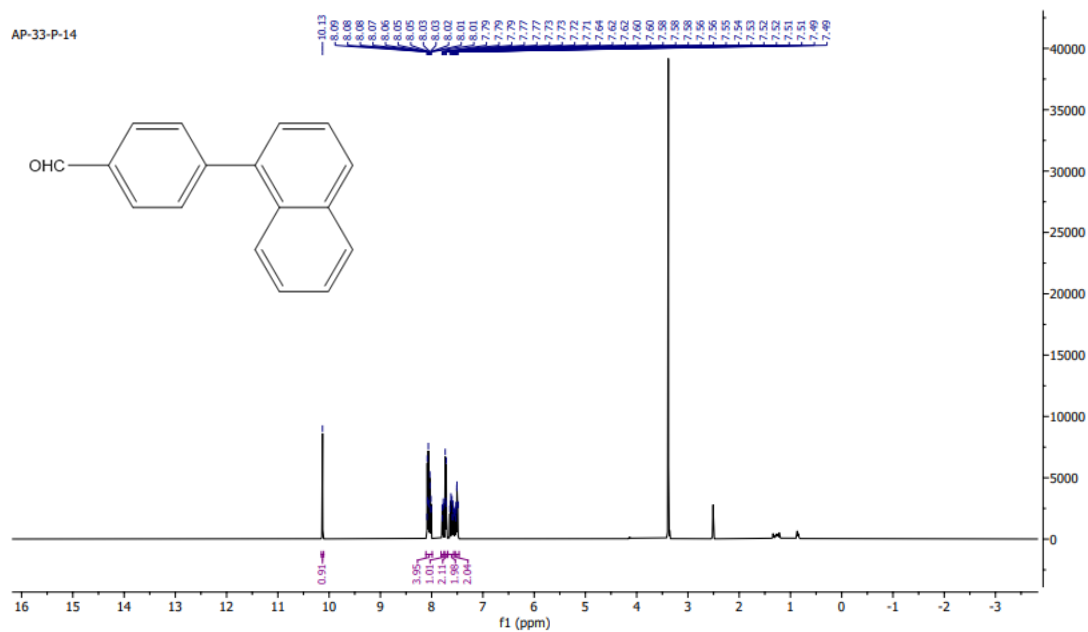

**Figure 20A:**  $^1\text{H}$  NMR (400 MHz, DMSO) of 4-(naphthalen-1-yl)benzaldehyde (20f)

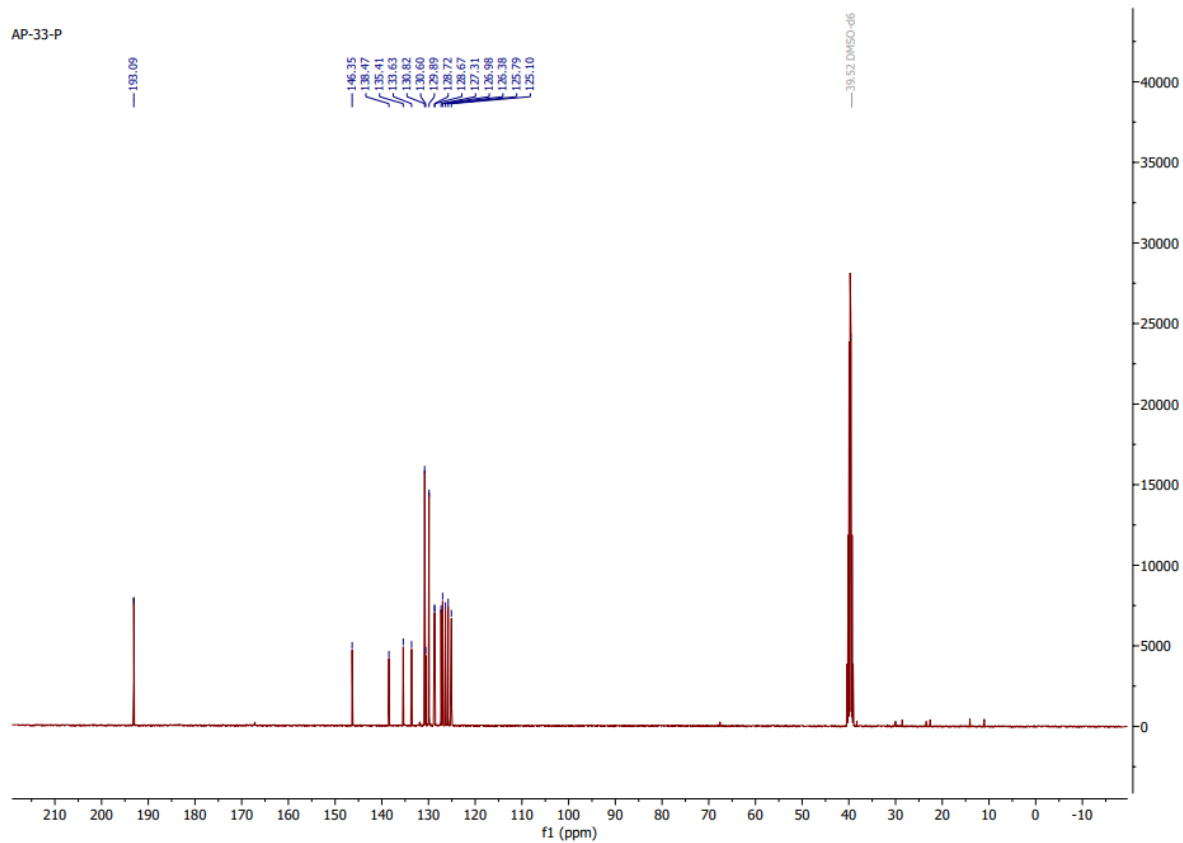

**Figure 20B:**  $^{13}\text{C}$  NMR (101 MHz, DMSO) of 4-(naphthalen-1-yl)benzaldehyde (20f)

- 21. 4'-methoxy-[1,1'-biphenyl]-4-carbaldehyde (21f):**  $^1\text{H}$  NMR (400 MHz, DMSO)  $\delta$  10.03 (s, 1H), 8.00 – 7.93 (m, 2H), 7.92 – 7.85 (m, 2H), 7.79 – 7.71 (m, 2H), 7.12 – 7.04 (m, 2H), 3.82 (s, 3H). MS,  $m/z$  (%): 212 [ $\text{M}^+$ ].

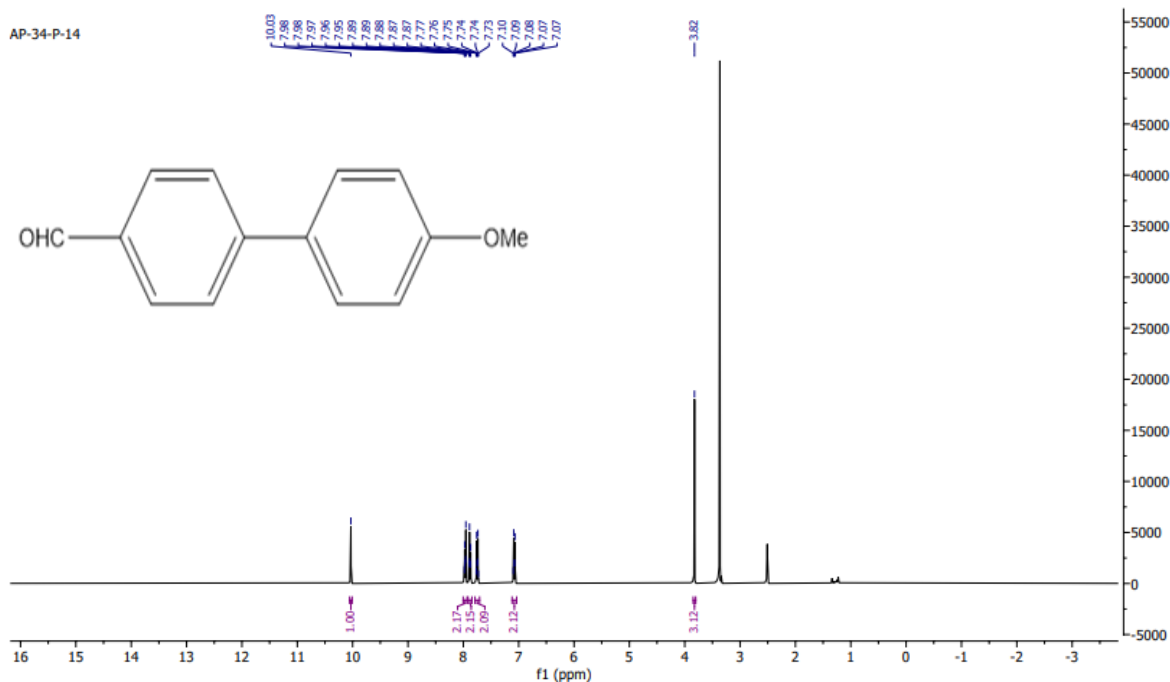

**Figure 21A:**  $^1\text{H NMR}$  (400 MHz, DMSO) of 4'-methoxy-[1,1'-biphenyl]-4-carbaldehyde (21f)

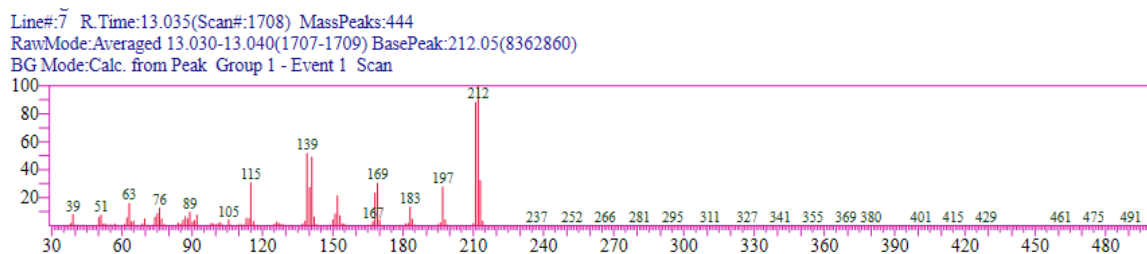

**Figure 21B:** GC-MS spectrum of 4'-methoxy-[1,1'-biphenyl]-4-carbaldehyde (21f)

- 22. 1,1'-biphenyl (22f):**  $^1\text{H NMR}$  (400 MHz, DMSO)  $\delta$  8.05 (s, 1H), 7.82 – 7.76 (m, 1H), 7.66 (dd, 2H), 7.57 – 7.42 (m, 4H), 7.41 – 7.30 (m, 2H). MS,  $m/z$  (%): 154 [ $\text{M}^+$ ].



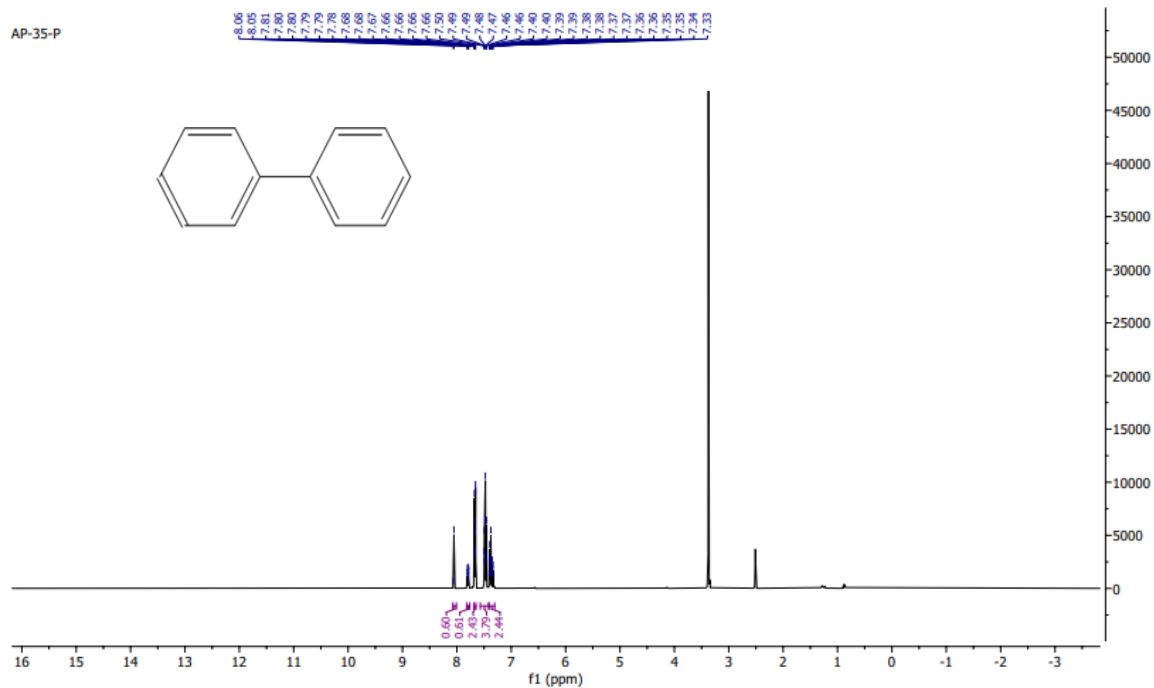

**Figure 22A:**  $^1\text{H}$  NMR (400 MHz, DMSO) of 1,1'-biphenyl (22f)

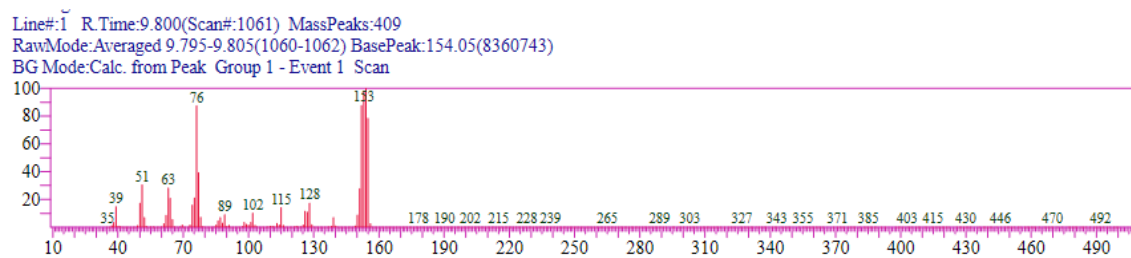

**Figure 22B:** GC-MS spectrum of 1,1'-biphenyl (22f)

**23. 1-phenylnaphthalene (23f):**  $^1\text{H}$  NMR (400 MHz, DMSO)  $\delta$  8.10 – 7.93 (m, 2H), 7.84 – 7.77 (m, 1H), 7.68 – 7.36 (m, 9H). MS,  $m/z$  (%): 204 [ $\text{M}^+$ ].

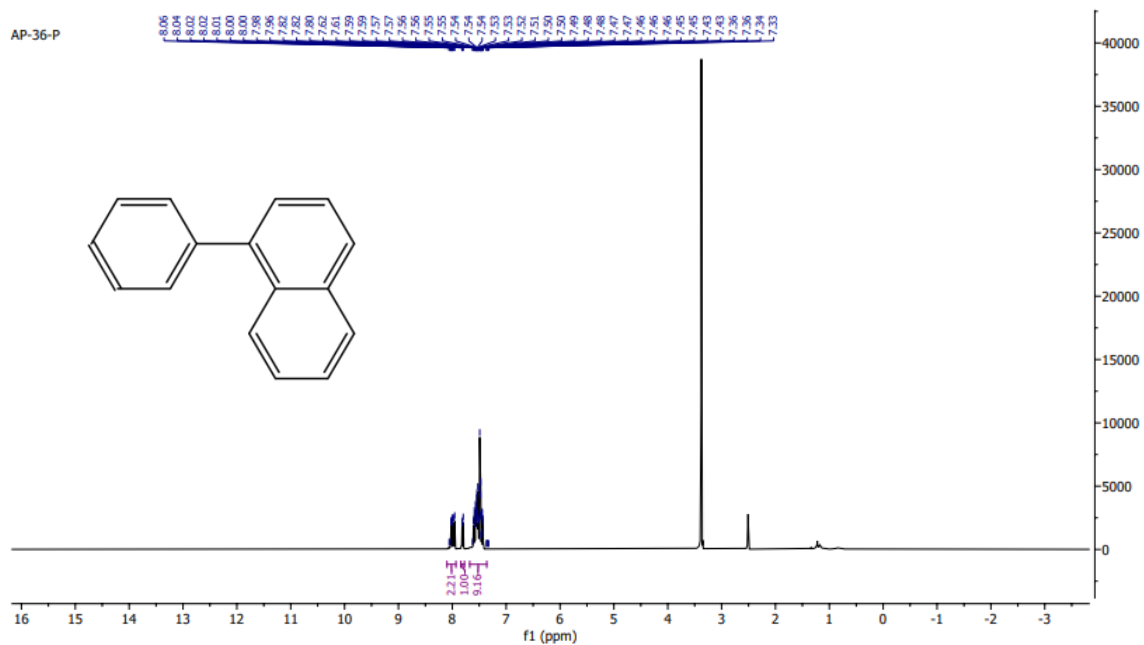

**Figure 23A:**  $^1\text{H}$  NMR (400 MHz, DMSO) of 1-phenylnaphthalene (23f)

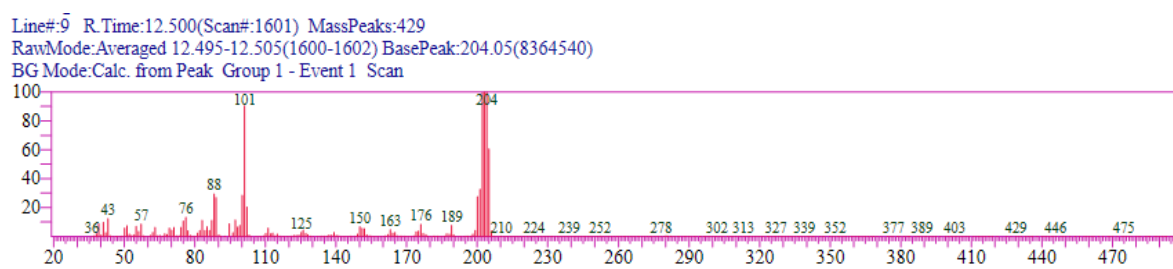

**Figure 23B:** GC-MS spectrum of 1-phenylnaphthalene (23f)

24. **4-methoxy-1,1'-biphenyl (24f):**  $^1\text{H NMR}$  (400 MHz, DMSO)  $\delta$  7.64 – 7.56 (m, 4H), 7.43 (t,  $J = 7.7$  Hz, 2H), 7.35 – 7.26 (m, 1H), 7.06 – 6.98 (m, 2H), 3.79 (s, 3H).

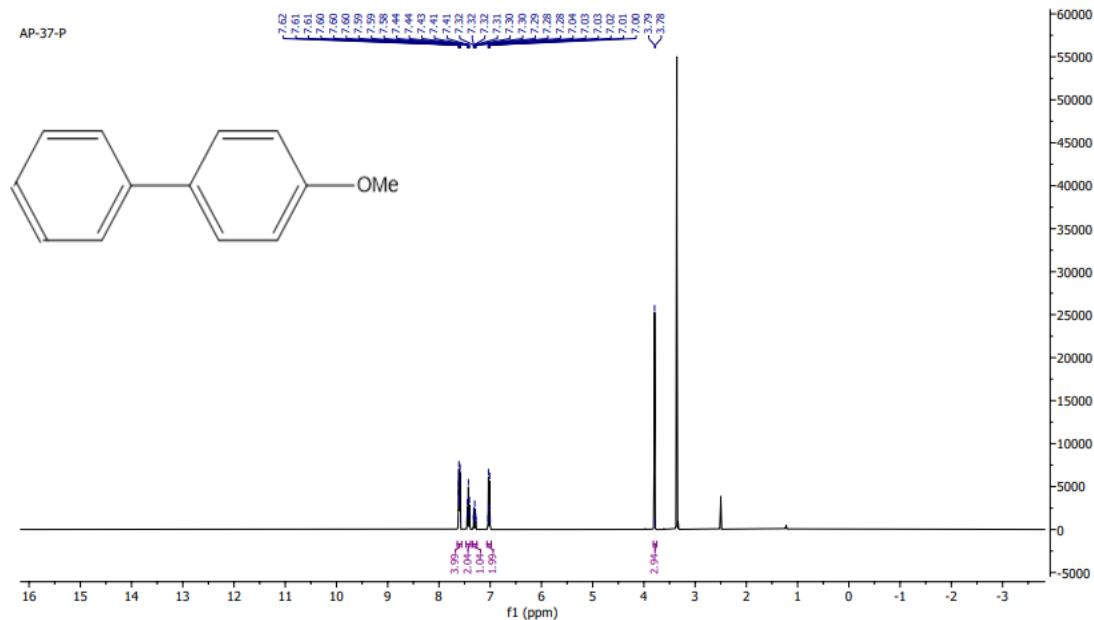

**Figure 24A:**  $^1\text{H NMR}$  (400 MHz, DMSO) of 4-methoxy-1,1'-biphenyl (24f)

25. **4-methoxy-1,1'-biphenyl (25f):** MS,  $m/z$  (%): 184 [ $\text{M}^+$ ].

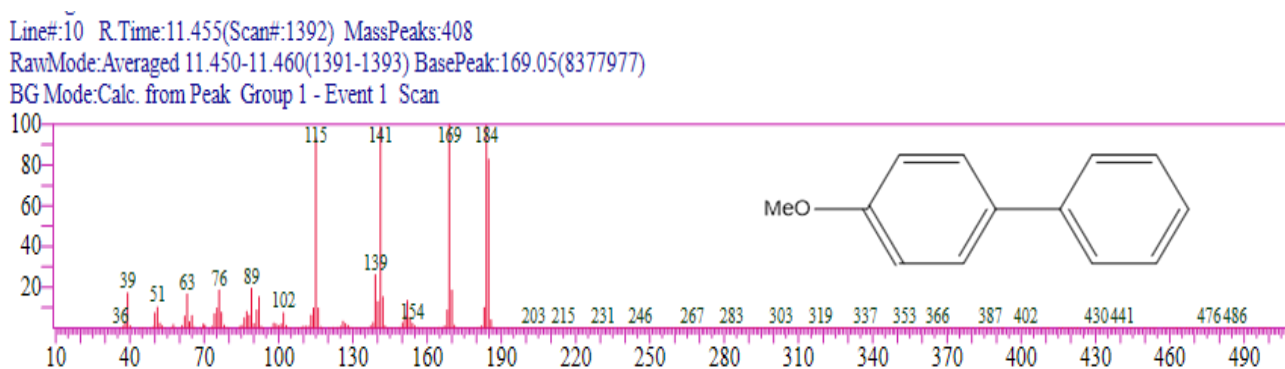

**Figure 25A:** GC-MS spectrum of 4-methoxy-1,1'-biphenyl (25f)

**26. 1-(4-methoxyphenyl)naphthalene (26f): MS,  $m/z$  (%): 234 [M<sup>+</sup>].**

Line#:13 R.Time:13.870(Scan#:1875) MassPeaks:406  
RawMode:Averaged 13.865-13.875(1874-1876) BasePeak:234.05(8182731)  
BG Mode:Calc. from Peak Group 1 - Event 1 Scan

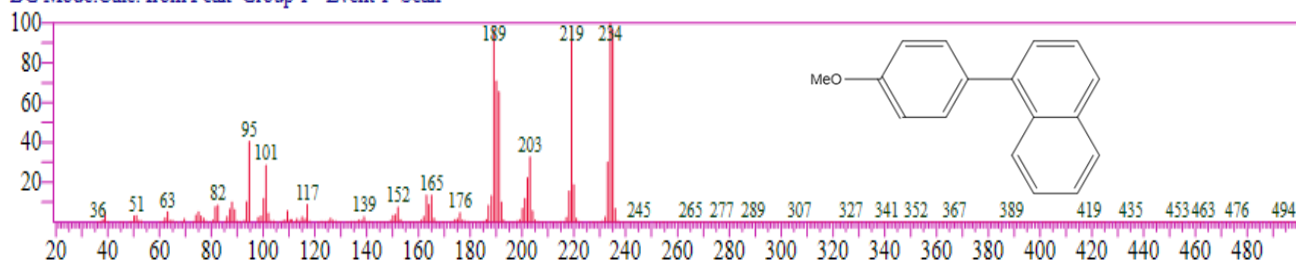

**Figure 26A:** GC-MS spectrum of 1-(4-methoxyphenyl)naphthalene (26f)

**27. 4,4'-dimethoxy-1,1'-biphenyl (27f): MS,  $m/z$  (%): 214 [M<sup>+</sup>].**

Line#:10 R.Time:12.675(Scan#:1636) MassPeaks:423  
RawMode:Averaged 12.670-12.680(1635-1637) BasePeak:214.05(8322858)  
BG Mode:Calc. from Peak Group 1 - Event 1 Scan

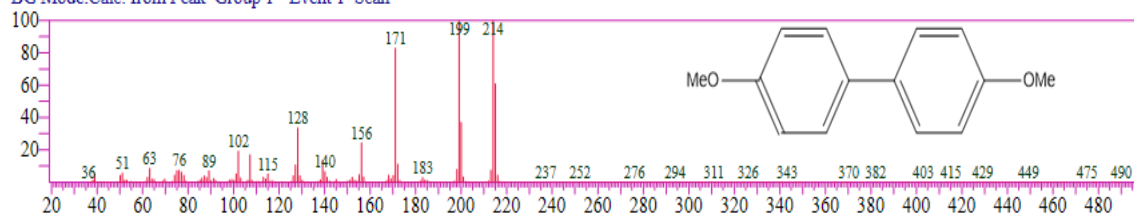

**Figure 27A:** GC-MS spectrum of 4,4'-dimethoxy-1,1'-biphenyl (27f)

**28. 1,1'-biphenyl (28f): MS,  $m/z$  (%): 154 [M<sup>+</sup>].**

Line#:1 R.Time:9.880(Scan#:1077) MassPeaks:257  
RawMode:Averaged 9.875-9.885(1076-1078) BasePeak:154.10(52512)  
BG Mode:Calc. from Peak Group 1 - Event 1 Scan

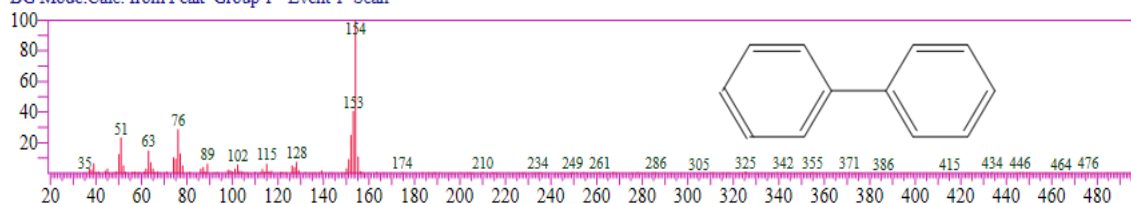

**Figure 28A:** GC-MS spectrum of 1,1'-biphenyl (28f)

## 29. GC-MS spectrum of Hot filtration analysis.

D:\GCMSDATA\2.Method files\M-1 (product confirmation met)

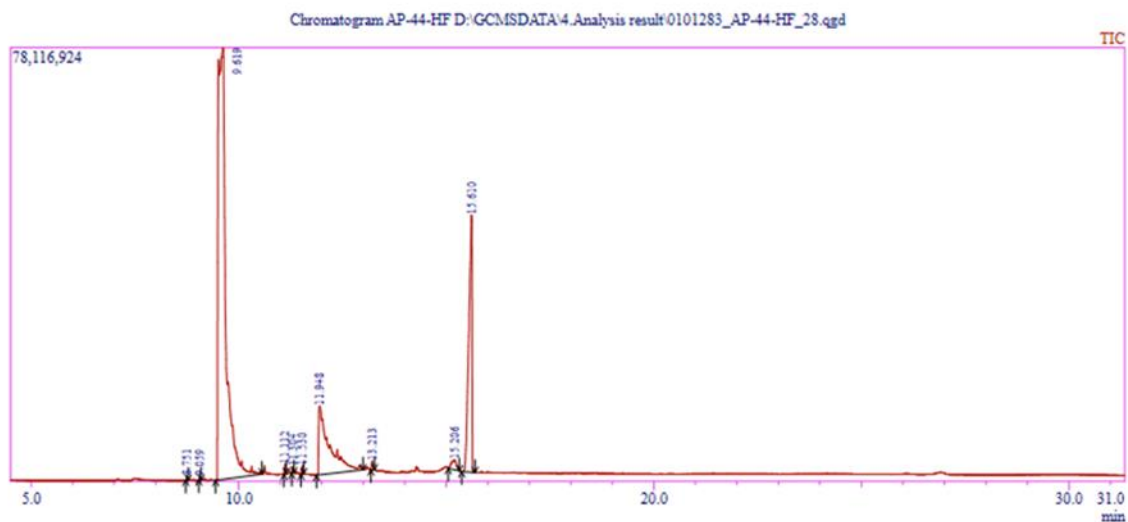

| Peak# | R.Time | Area       | Area%  | Height    | Height% | A/H   | Name                                           |
|-------|--------|------------|--------|-----------|---------|-------|------------------------------------------------|
| 1     | 8.751  | 1007292    | 0.07   | 761594    | 0.52    | 1.32  | Decane, 3,7-dimethyl-                          |
| 2     | 9.059  | 833305     | 0.06   | 619721    | 0.43    | 1.34  | Dodecane, 2,6,11-trimethyl-                    |
| 3     | 9.619  | 1019378365 | 67.52  | 77761112  | 53.41   | 13.11 | Phenol, 3-bromo-                               |
| 4     | 11.112 | 2145295    | 0.14   | 1655715   | 1.14    | 1.30  | Nonadecane                                     |
| 5     | 11.304 | 1407708    | 0.09   | 1148306   | 0.79    | 1.23  | Hexadecane                                     |
| 6     | 11.530 | 2119052    | 0.14   | 1488817   | 1.02    | 1.42  | Cetene                                         |
| 7     | 11.948 | 218307859  | 14.46  | 12418531  | 8.53    | 17.58 | 3-Hydroxybiphenyl                              |
| 8     | 13.213 | 4130104    | 0.27   | 1548581   | 1.06    | 2.67  | Hexadecanoic acid, 1,1-dimethylethyl ester     |
| 9     | 15.206 | 14711980   | 0.97   | 1791267   | 1.23    | 8.21  | Phenol, 2,4-bis(1,1-dimethylethyl)-, phosphite |
| 10    | 15.610 | 245651422  | 16.27  | 46385995  | 31.86   | 5.30  | Bis(2-ethylhexyl) phthalate                    |
|       |        | 1509692382 | 100.00 | 145579639 | 100.00  |       |                                                |

[1,1'-biphenyl]-4-ol: MS,  $m/z$  (%): 170 [ $M^+$ ].

Line#:7 R.Time:11.950(Scan#:1491) MassPeaks:413  
 RawMode:Averaged 11.945-11.955(1490-1492) BasePeak:170.10(3326021)  
 BG Mode:Calc. from Peak Group 1 - Event 1 Scan

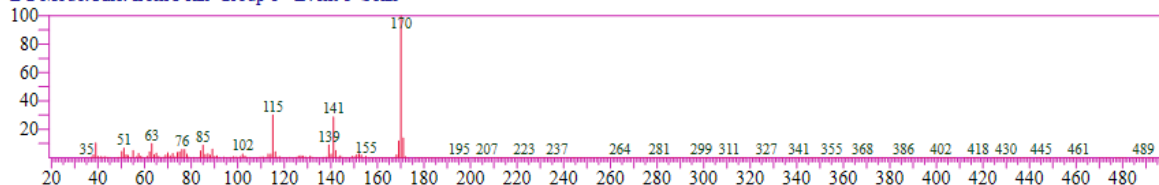

Supplement: d4na00116h1.pdf [file d4na00116h1.pdf]
